# Supplementary material for: Structural determination of arginine-linked cisplatin complexesviaIRMPD action spectroscopy: arginine binds to platinumviaNO−binding mode
Source: Royal Society of Chemistry journal article supplement (doi:10.1039/d1cp03407c), 2021-01-01
Supplement: d1cp03407c1.pdf [file d1cp03407c1.pdf]

## Structural Determination of Arginine-Linked Cisplatin Complexes via IRMPD Action Spectroscopy: Arginine Binds to Platinum via NO<sup>-</sup>-Binding Mode

C. C. He,<sup>a</sup> L. A. Hamlow,<sup>a</sup> B. Kimutai,<sup>a</sup> H. A. Roy,<sup>a</sup> Zachary J. Devereaux,<sup>a</sup> N. A. Cunningham,<sup>a</sup>  
J. K. Martens,<sup>b</sup> G. Berden,<sup>b</sup> J. Oomens,<sup>bc</sup> C. S. Chow, and M. T. Rodgers<sup>a,\*</sup>

<sup>a</sup>Department of Chemistry, Wayne State University, Detroit, Michigan 48202, United States

<sup>b</sup>Radboud University, Institute for Molecules and Materials, FELIX Laboratory, Toernooiveld 7c, 6525ED Nijmegen, The Netherlands

<sup>c</sup>van 't Hoff Institute for Molecular Sciences, University of Amsterdam, The Netherlands

### Figure Captions

**Figure S1.** IRMPD spectra of the [(Arg-H)PtCl<sub>2</sub>]<sup>-</sup> and [(Arg)PtCl<sub>2</sub>+Na]<sup>+</sup> complexes in the fingerprint region measured under variable attenuation of the FEL.

**Figure S2.** Binding modes of Arg to the Pt center of the [(Arg-H)PtCl<sub>2</sub>]<sup>-</sup> complex and the designated nomenclature.

**Figure S3.** Binding modes of Arg to the Pt center with possible sodium binding modes of the [(Arg)PtCl<sub>2</sub>+Na]<sup>+</sup> complex and the designated nomenclature.

**Figure S4.** Stable low-energy conformers of the [(Arg-H)PtCl<sub>2</sub>]<sup>-</sup> complex and their relative Gibbs energies at 298 K calculated at B3LYP/mDZP/def2-TZVP level of theory. Structures are classified by the Arg binding mode to Pt.

**Figure S5.** Stable low-energy conformers of the [(Arg)PtCl<sub>2</sub>+Na]<sup>+</sup> complex and their relative Gibbs energies at 298 K calculated at B3LYP/mDZP/def2-TZVP level of theory. Structures are classified by the Arg binding mode to Pt.

**Figure S6.** Comparison of the experimental IRMPD spectrum of [(Arg-H)PtCl<sub>2</sub>]<sup>-</sup> with theoretical IR spectra predicted for select NN<sub>s</sub> binding conformers along with their optimized structures and relative Gibbs energies computed at B3LYP/mDZP/def2-TZVP level of theory at 298 K. Misaligned IR features are highlighted in red.

**Figure S7.** Comparison of the experimental IRMPD spectrum of [(Arg-H)PtCl<sub>2</sub>]<sup>-</sup> with theoretical IR spectra predicted for select NO<sup>-</sup> binding conformers along with their optimized structures and relative Gibbs energies computed at B3LYP/mDZP/def2-TZVP level of theory at 298 K. Misaligned IR features are highlighted in red.

**Figure S8.** Comparison of the experimental IRMPD spectrum of  $[(\text{Arg-H})\text{PtCl}_2]^-$  with theoretical IR spectra predicted for select  $\text{N}_s\text{O}^-$  binding conformers along with their optimized structures and relative Gibbs energies computed at B3LYP/mDZP/def2-TZVP level of theory at 298 K. Misaligned IR features are highlighted in red.

**Figure S9.** Comparison of the experimental IRMPD spectrum of  $[(\text{Arg-H})\text{PtCl}_2]^-$  with theoretical IR spectra predicted for select  $\text{OO}^-$  binding conformers along with their optimized structures and relative Gibbs energies computed at B3LYP/mDZP/def2-TZVP level of theory at 298 K. Misaligned IR features are highlighted in red.

**Figure S10.** Comparison of the experimental IRMPD spectrum of  $[(\text{Arg-H})\text{PtCl}_2]^-$  with theoretical IR spectra predicted for select conformers with other side chain binding modes along with their optimized structures and relative Gibbs energies computed at B3LYP/mDZP/def2-TZVP level of theory at 298 K. Misaligned IR features are highlighted in red.

**Figure S11.** Comparison of the experimental IRMPD spectrum of  $[(\text{Arg})\text{PtCl}_2+\text{Na}]^+$  with theoretical IR spectra predicted for select  $\text{NN}_s$  binding conformers along with their optimized structures and relative Gibbs energies computed at B3LYP/mDZP/def2-TZVP level of theory at 298 K. Misaligned IR features are highlighted in red.

**Figure S12.** Comparison of the experimental IRMPD spectrum of  $[(\text{Arg})\text{PtCl}_2+\text{Na}]^+$  with theoretical IR spectra predicted for the  $\text{NO}^-$  binding conformers along with their optimized structures and relative Gibbs energies computed at B3LYP/mDZP/def2-TZVP level of theory at 298 K. Misaligned IR features are highlighted in red.

**Figure S13.** Comparison of the experimental IRMPD spectrum of  $[(\text{Arg})\text{PtCl}_2+\text{Na}]^+$  with theoretical IR spectra predicted for select  $\text{N}_s\text{O}$  binding conformers along with their optimized structures and relative Gibbs energies computed at B3LYP/mDZP/def2-TZVP level of theory at 298 K. Misaligned IR features are highlighted in red.

**Figure S14.** Comparison of the experimental IRMPD spectrum of  $[(\text{Arg})\text{PtCl}_2+\text{Na}]^+$  with theoretical IR spectra predicted for select  $\text{OO}^-$  binding conformers along with their optimized structures and relative Gibbs energies computed at B3LYP/mDZP/def2-TZVP level of theory at 298 K. Misaligned IR features are highlighted in red.

**Figure S15.** Comparison of the experimental IRMPD spectrum of  $[(\text{Arg})\text{PtCl}_2+\text{Na}]^+$  with theoretical IR spectra predicted for select conformers with other side chain binding modes along with their optimized structures and relative Gibbs energies computed at B3LYP/mDZP/def2-TZVP level of theory at 298 K. Misaligned IR features are highlighted in red.

Figure S1.

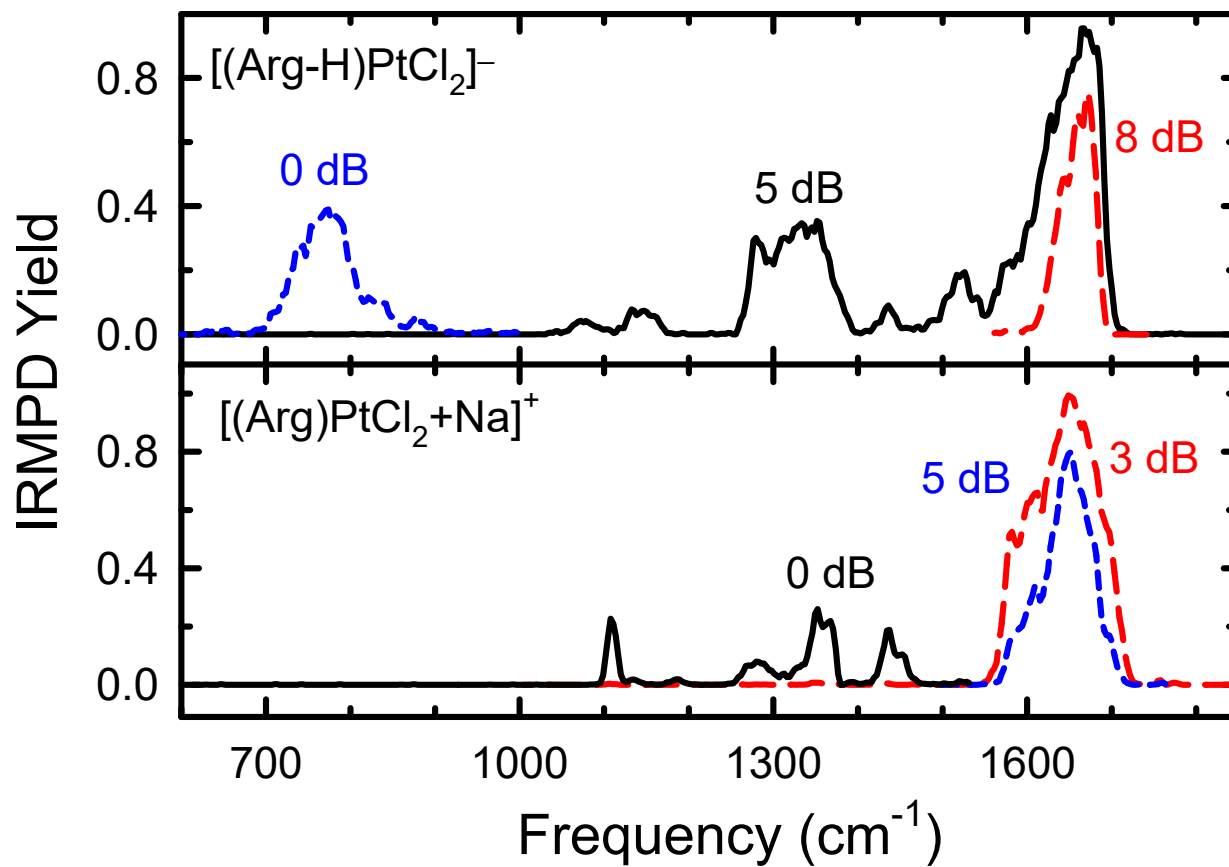

## Figure S2.

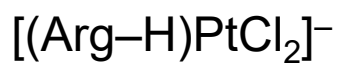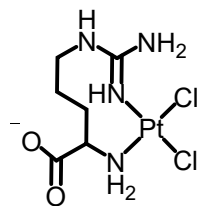NN<sub>s</sub>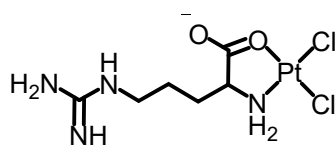NO<sup>-</sup>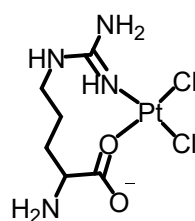N<sub>5</sub>O<sup>-</sup>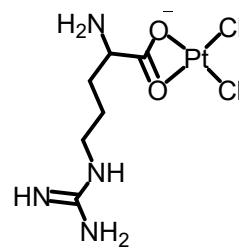OO<sup>-</sup>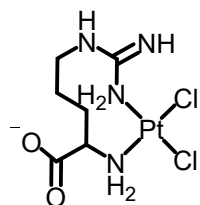NN<sub>ω</sub>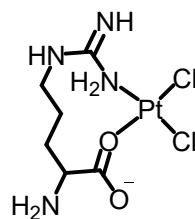N<sub>ω</sub>O<sup>-</sup>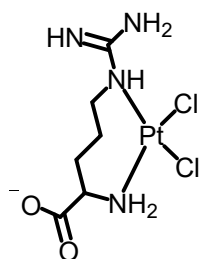NN<sub>ε</sub>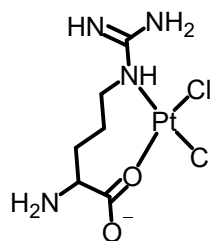N<sub>ε</sub>O<sup>-</sup>

## Figure S3.

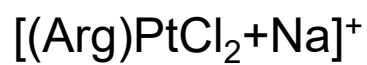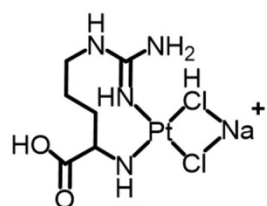NN<sub>s</sub>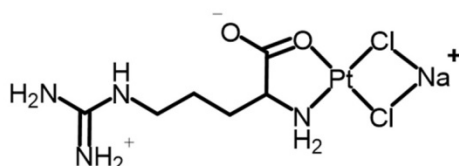NO<sup>-</sup>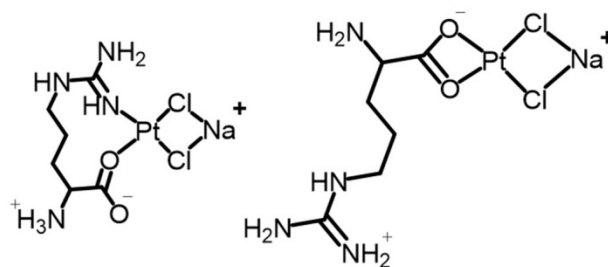N<sub>s</sub>O<sup>-</sup>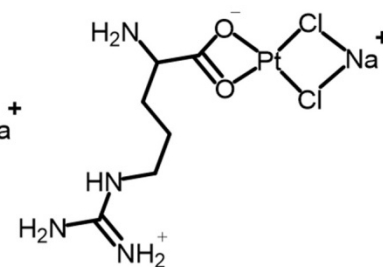OO<sup>-</sup>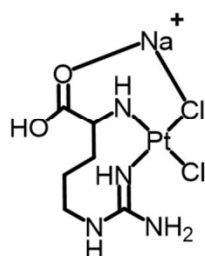NN<sub>s</sub>\_OCl<sub>s</sub>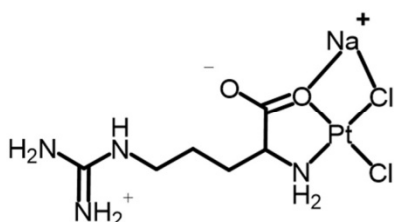NO<sup>-</sup>\_OCl<sub>b</sub>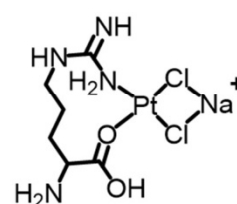N<sub>s</sub>O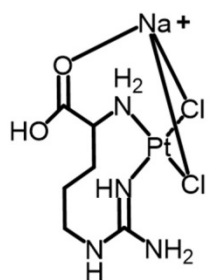NN<sub>s</sub>\_OCl<sub>b</sub>Cl<sub>s</sub>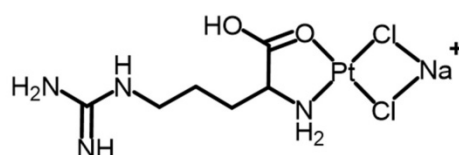

NO

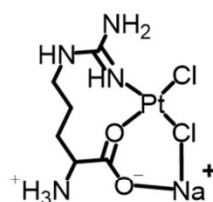N<sub>s</sub>O<sup>-</sup>\_OCl<sub>s</sub>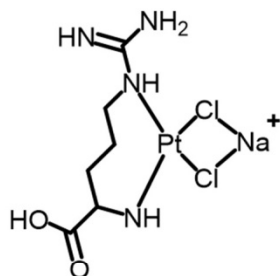NN<sub>ε</sub>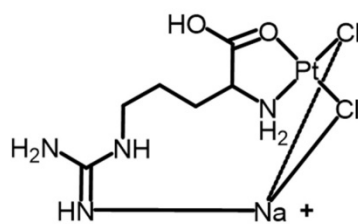NO<sub>N<sub>s</sub></sub>Cl<sub>b</sub>Cl<sub>o</sub>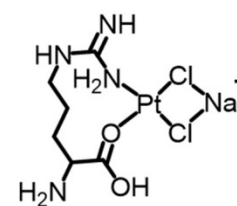N<sub>o</sub>O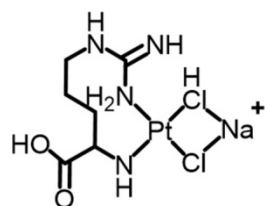NN<sub>ω</sub>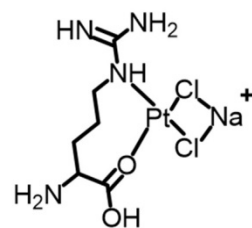N<sub>ε</sub>O

## Figure S4.

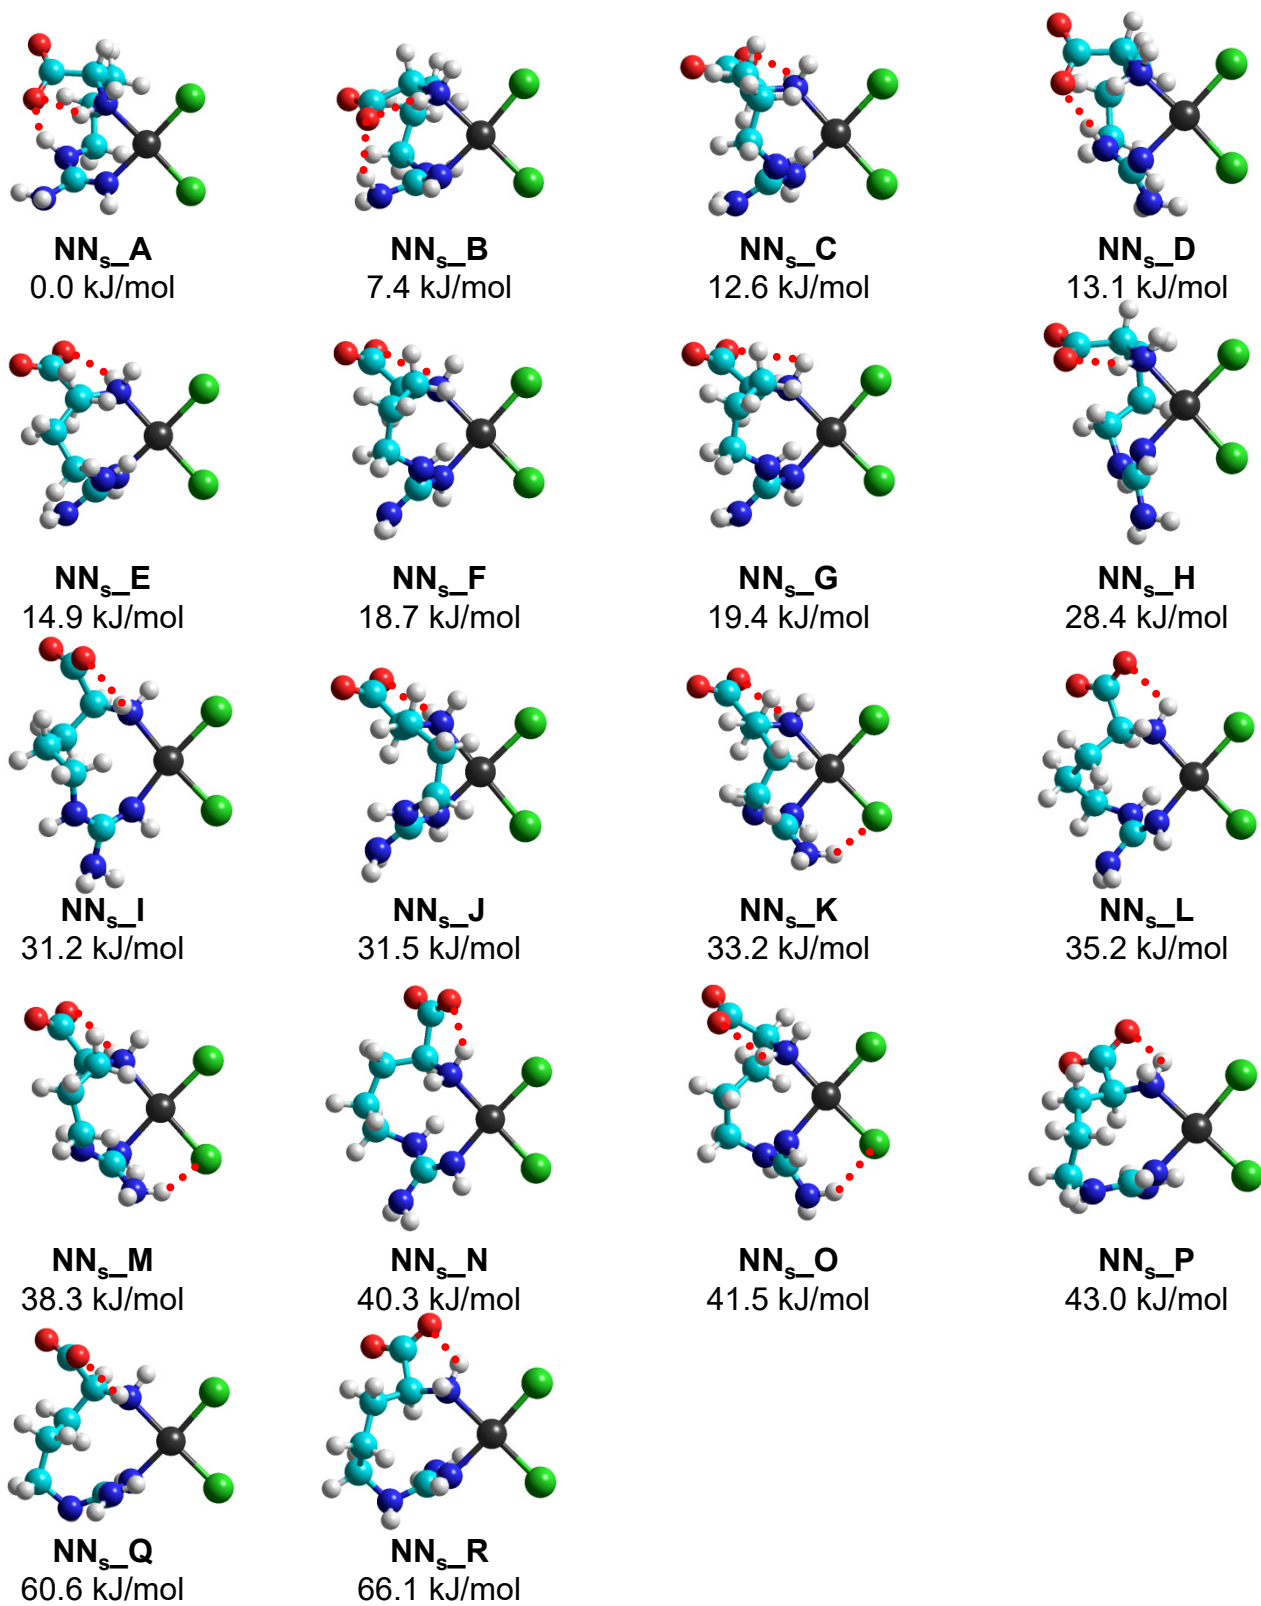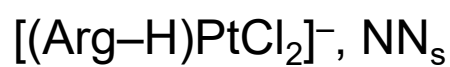

## Figure S4.

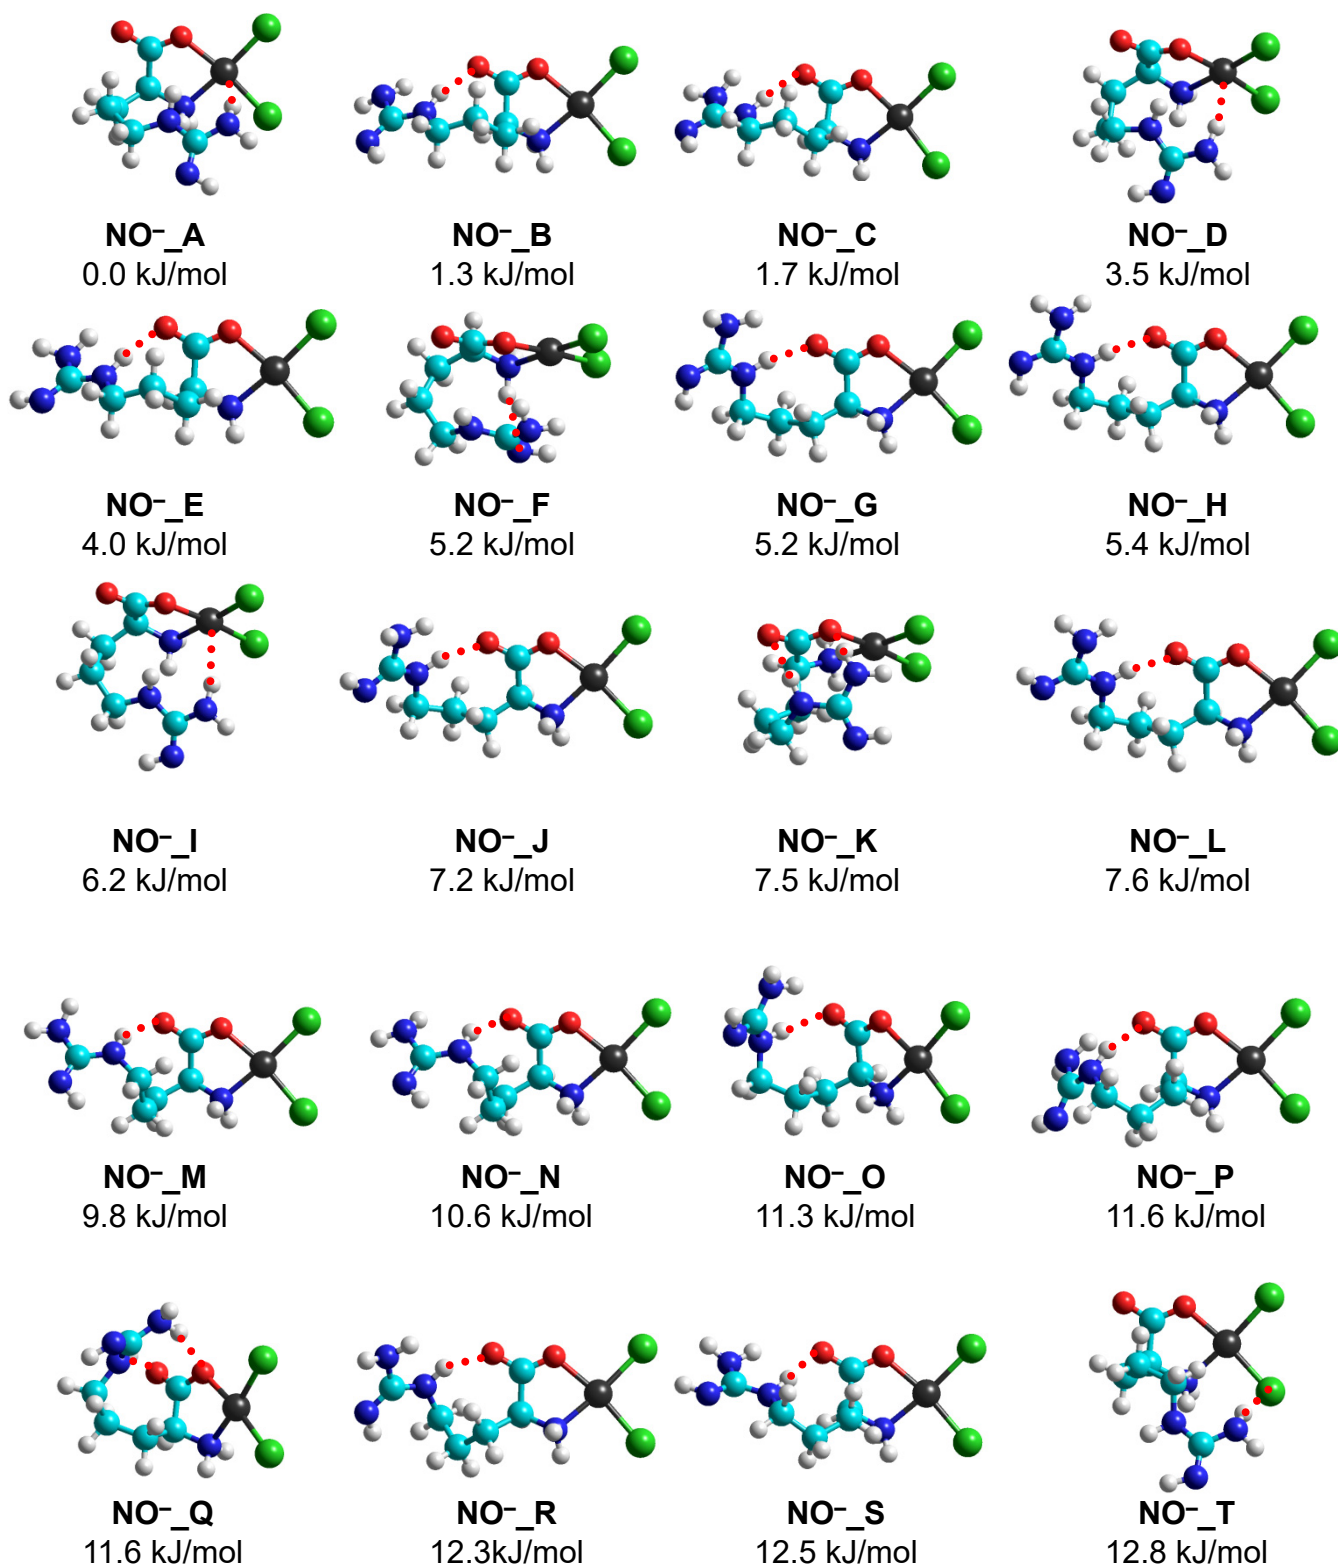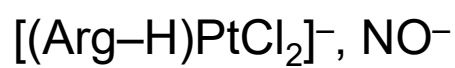

## Figure S4.

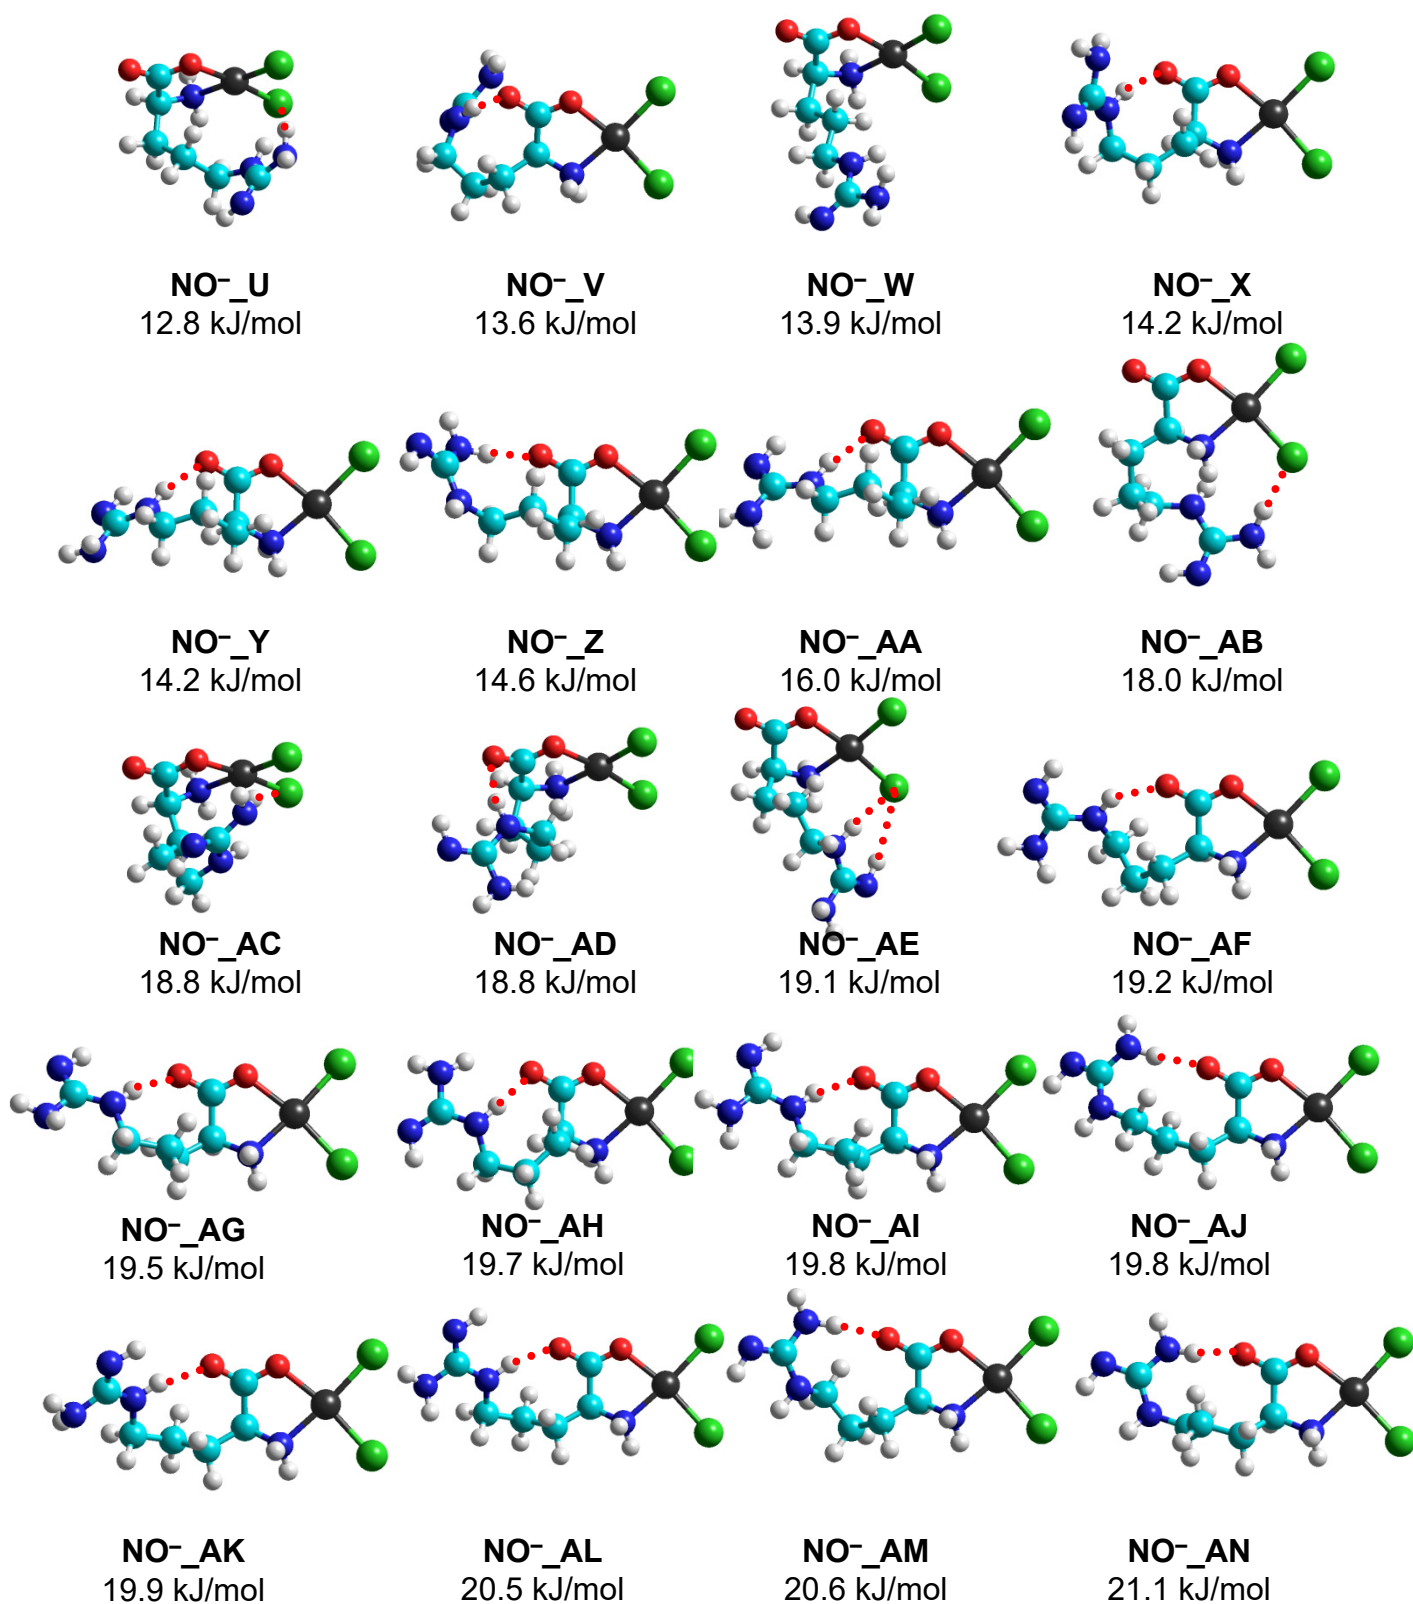



## Figure S4.

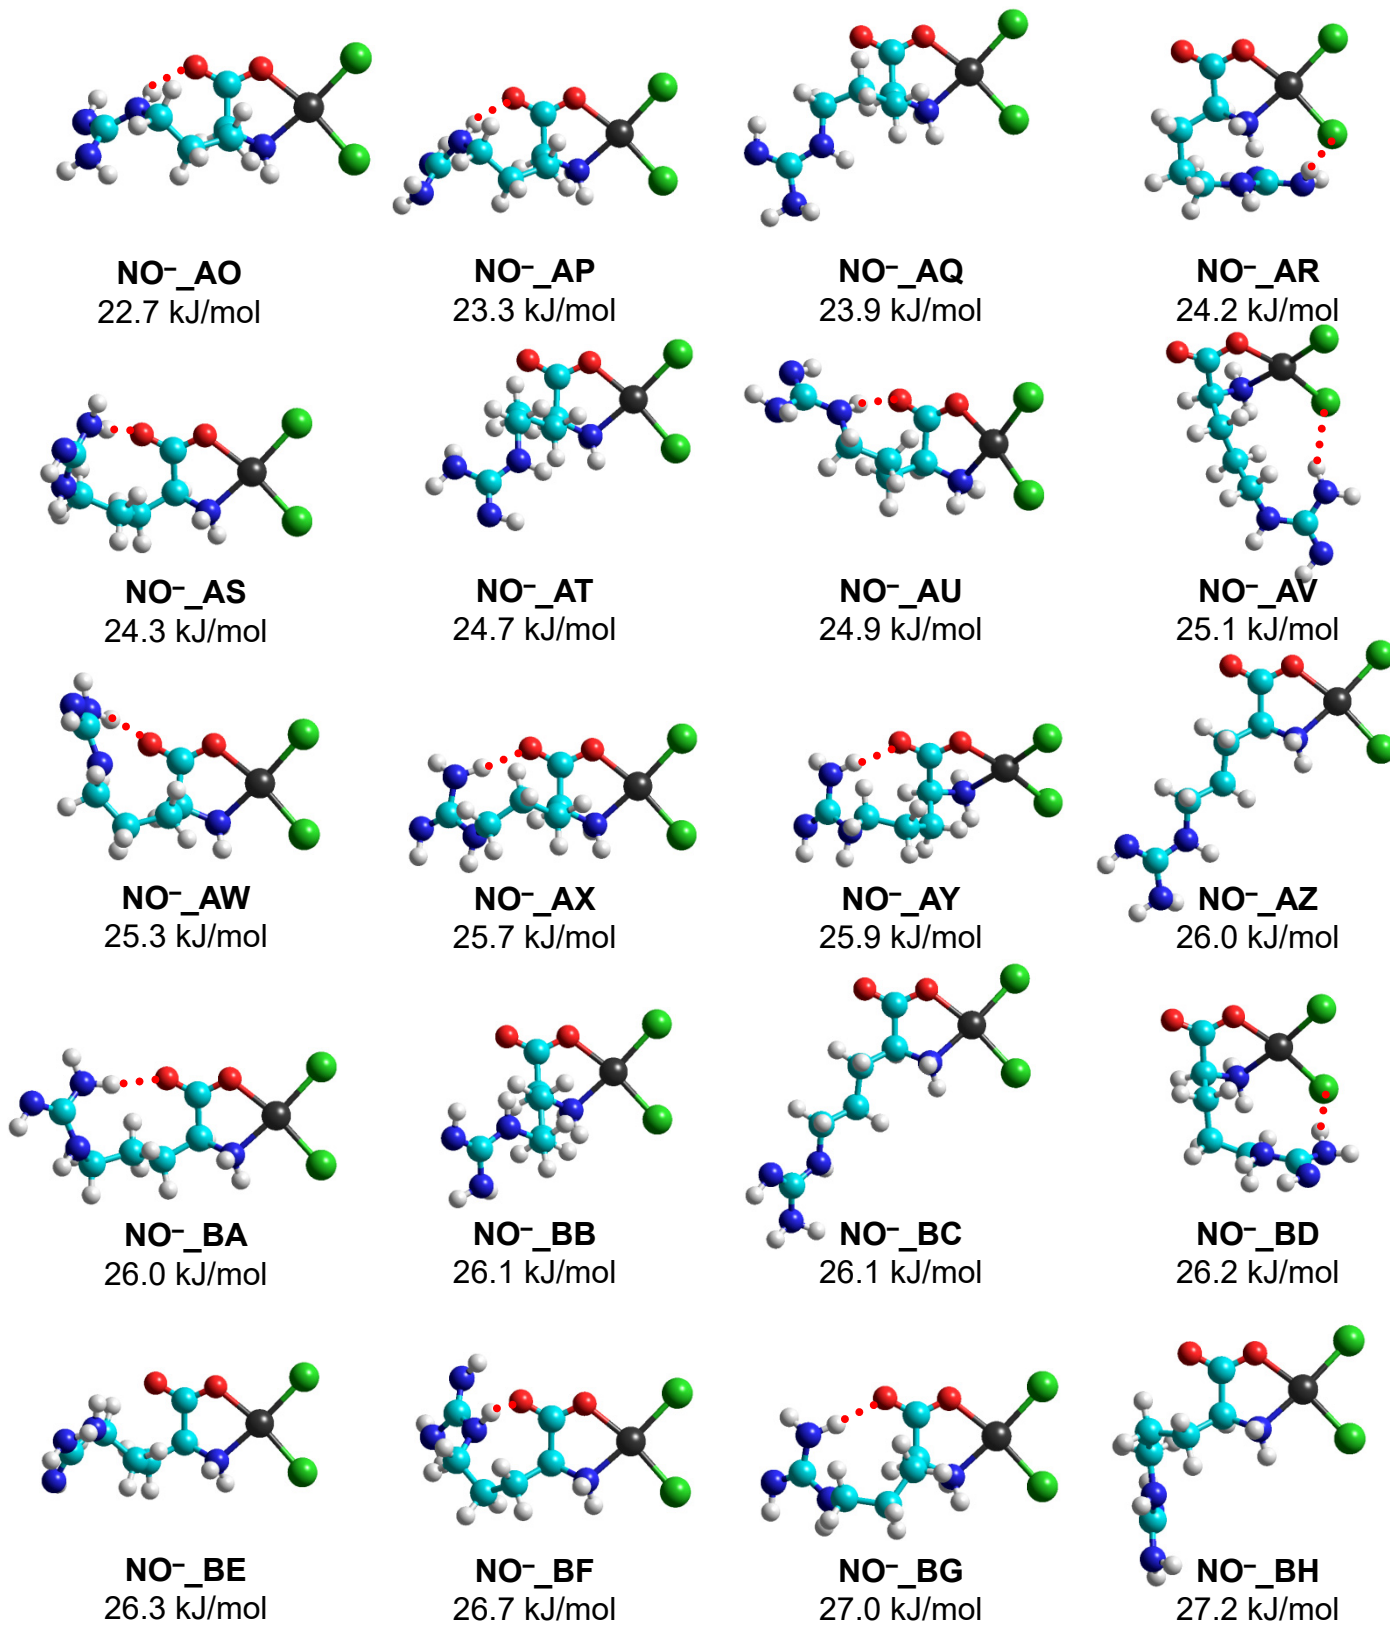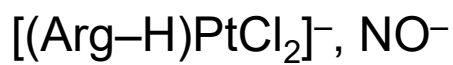

## Figure S4.

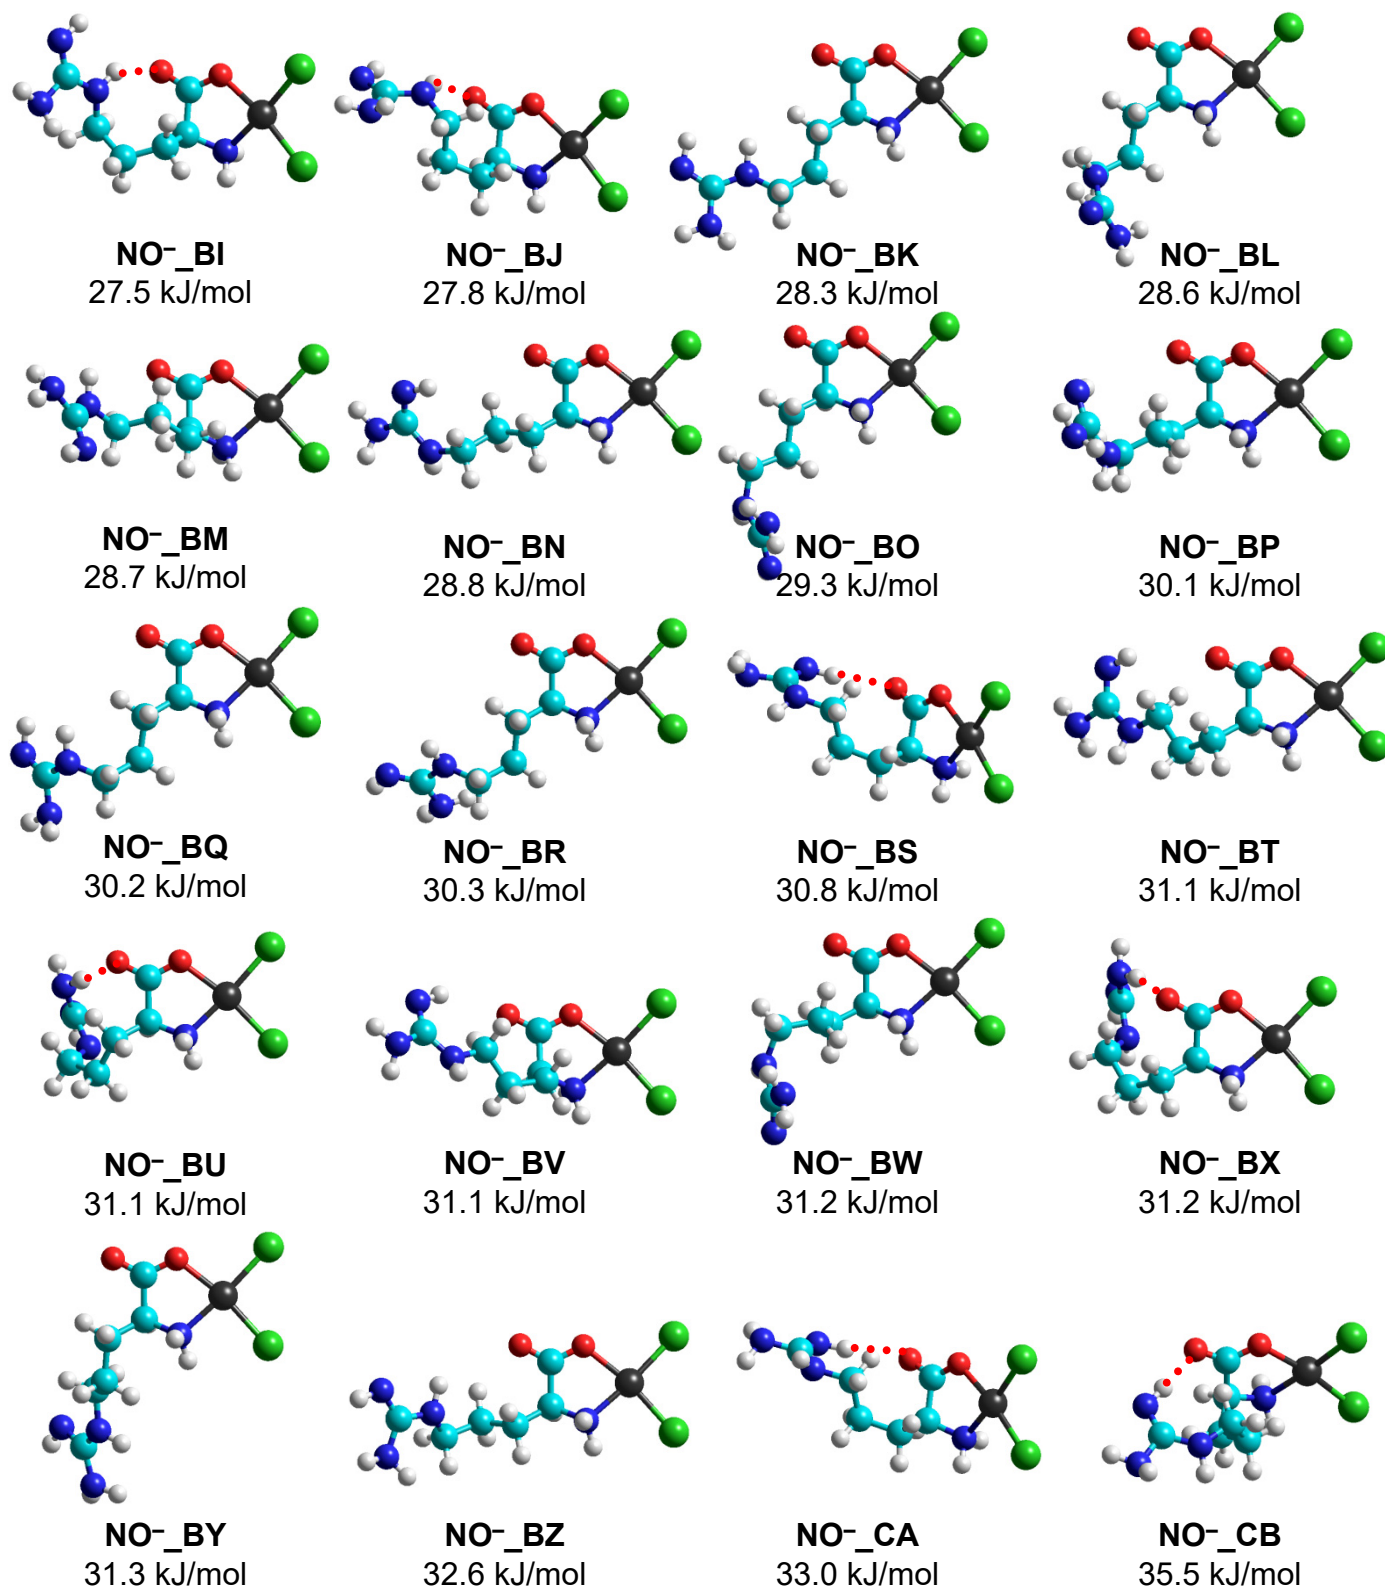

## Figure S4.

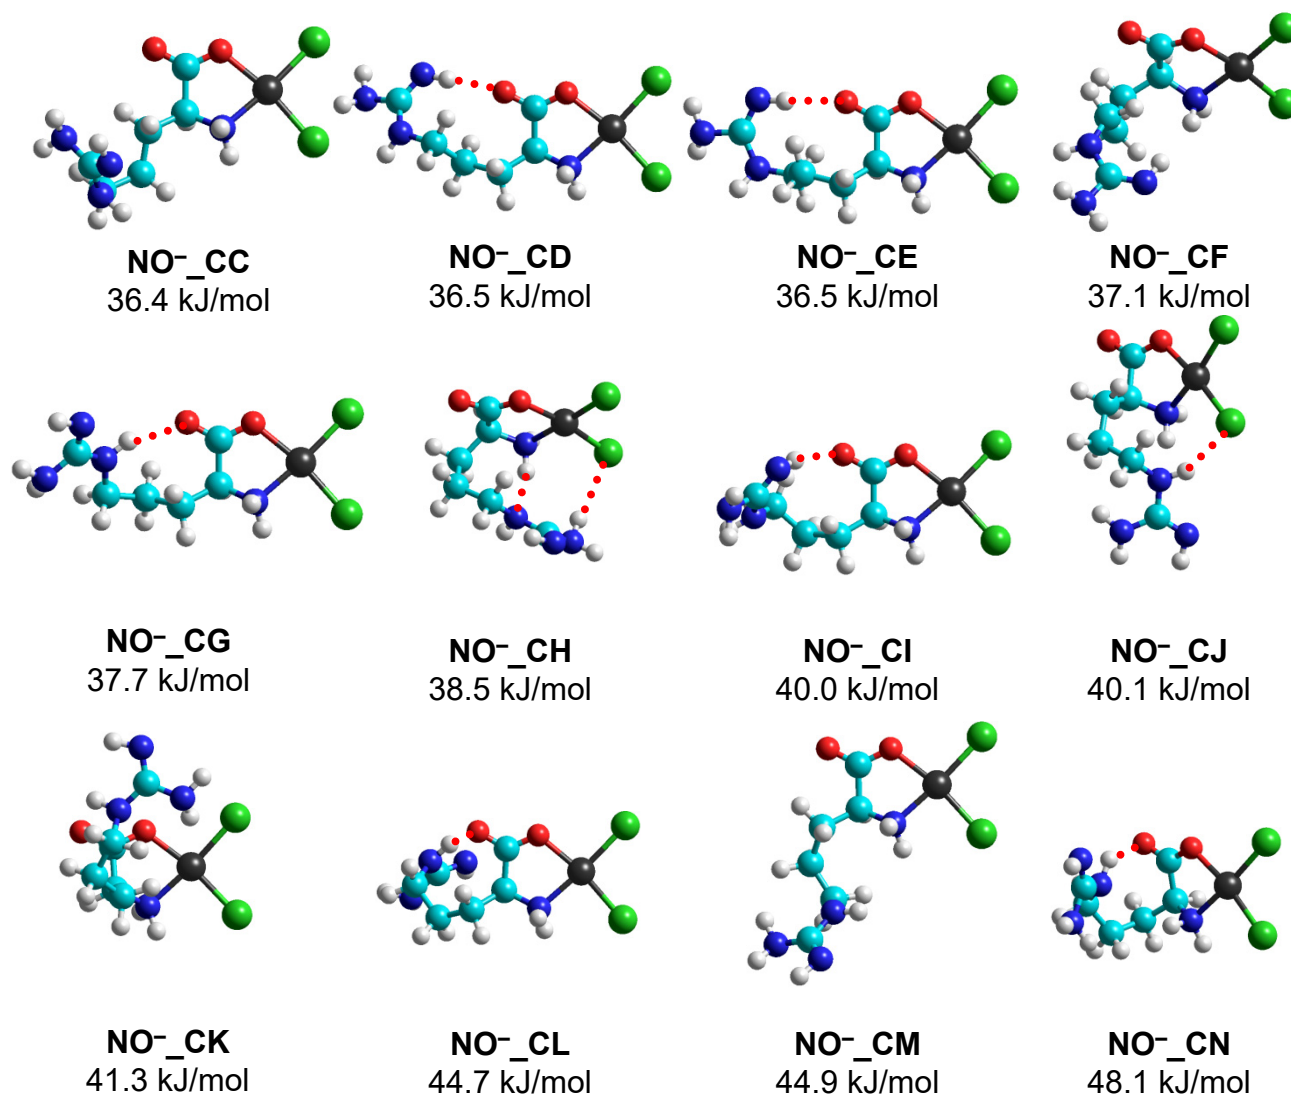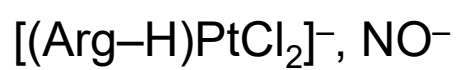

## Figure S4.

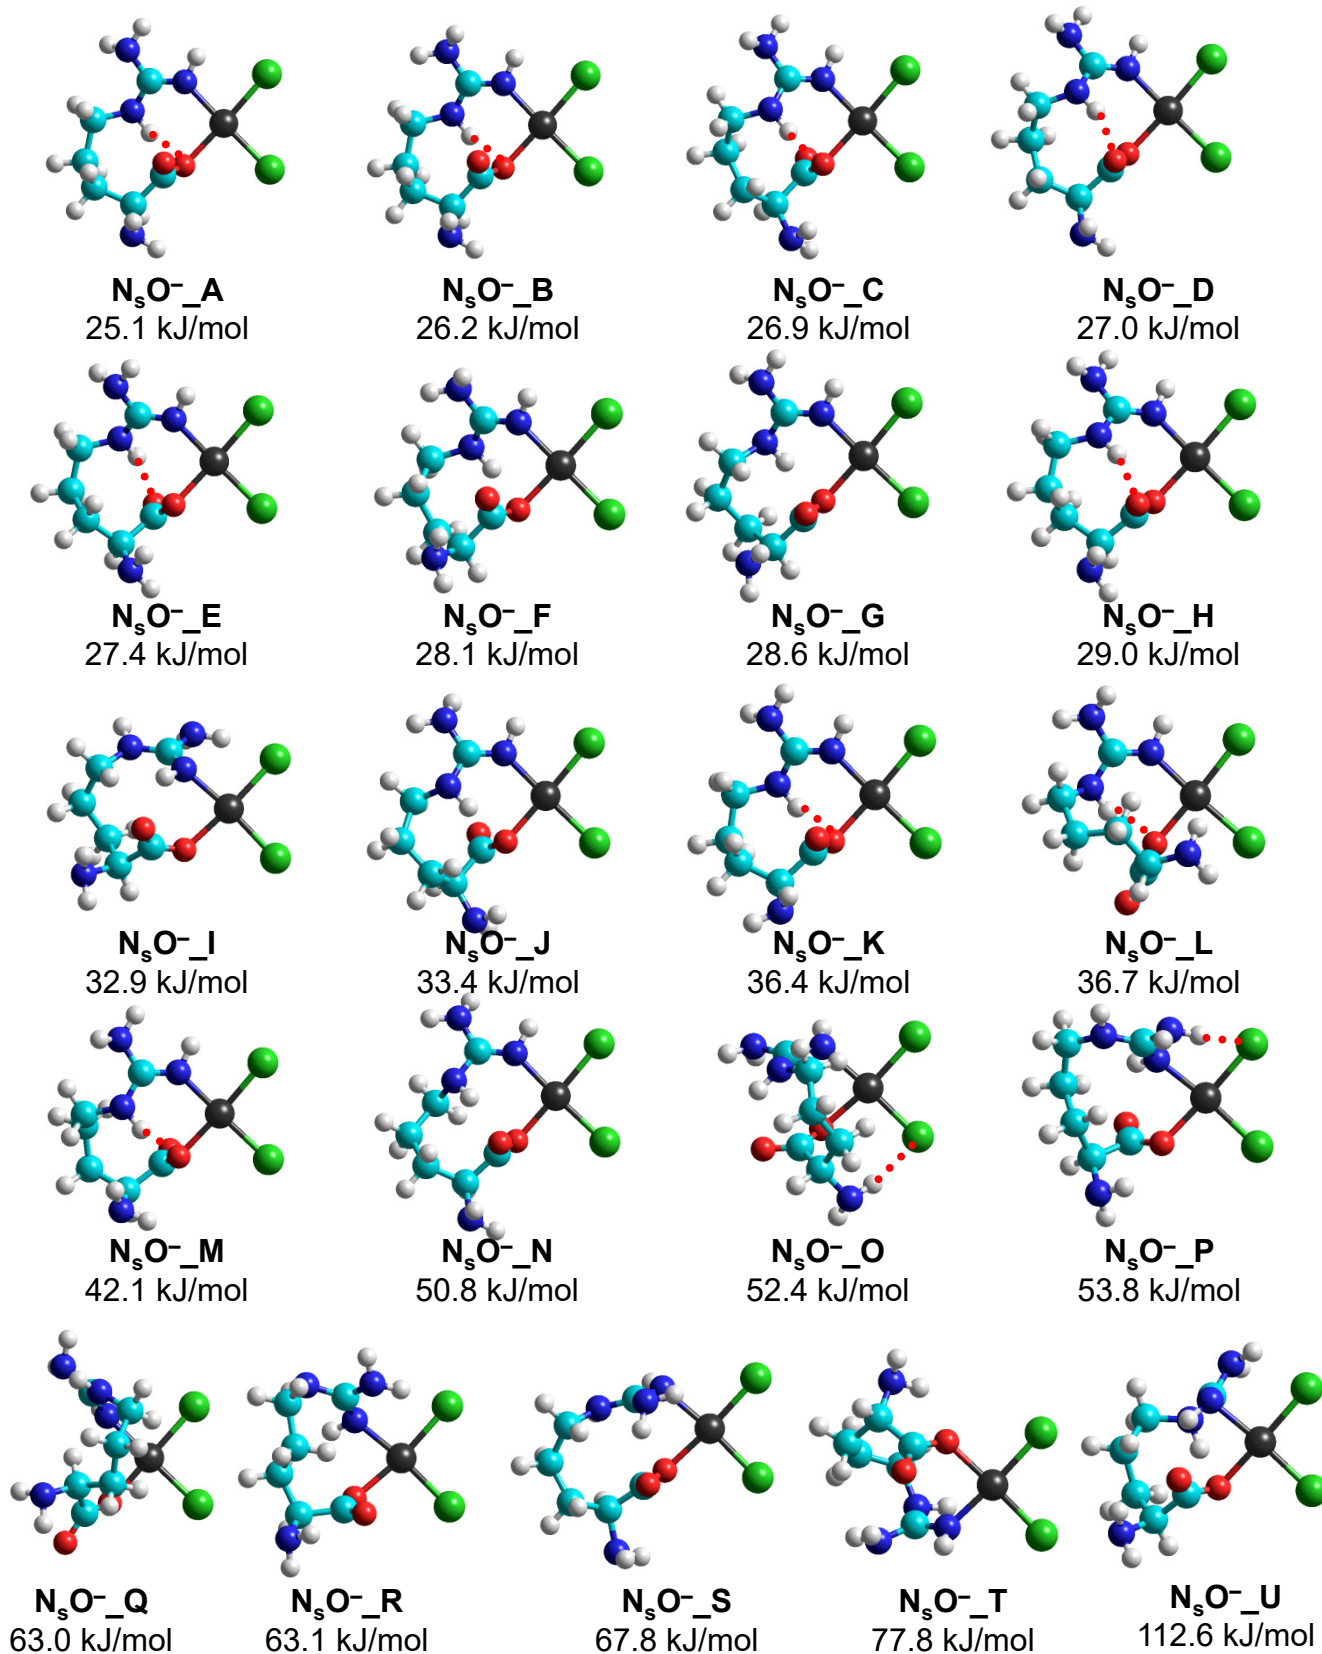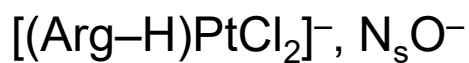

Figure S4.

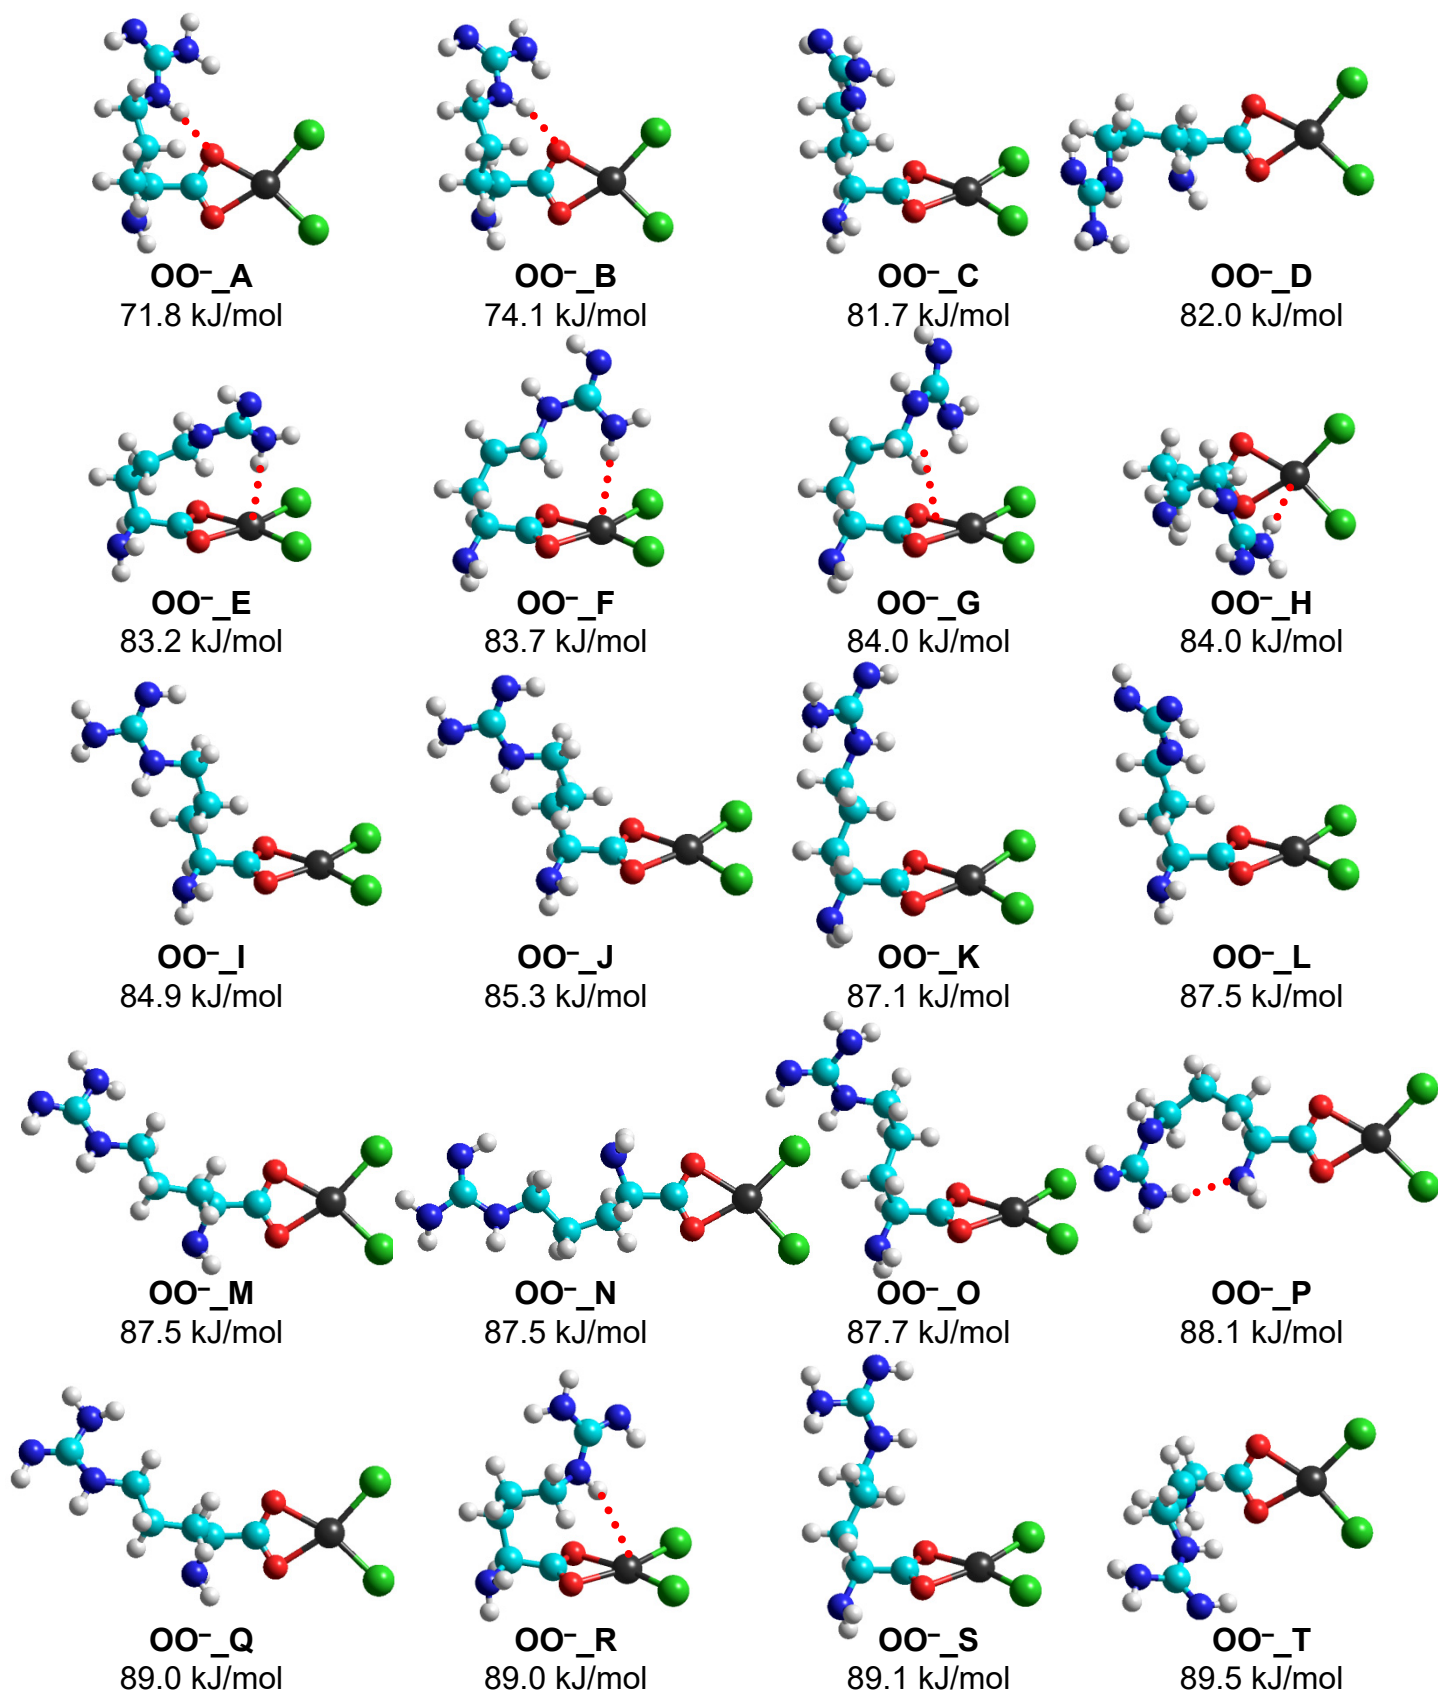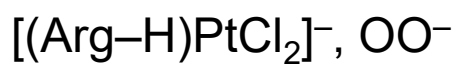

## Figure S4.

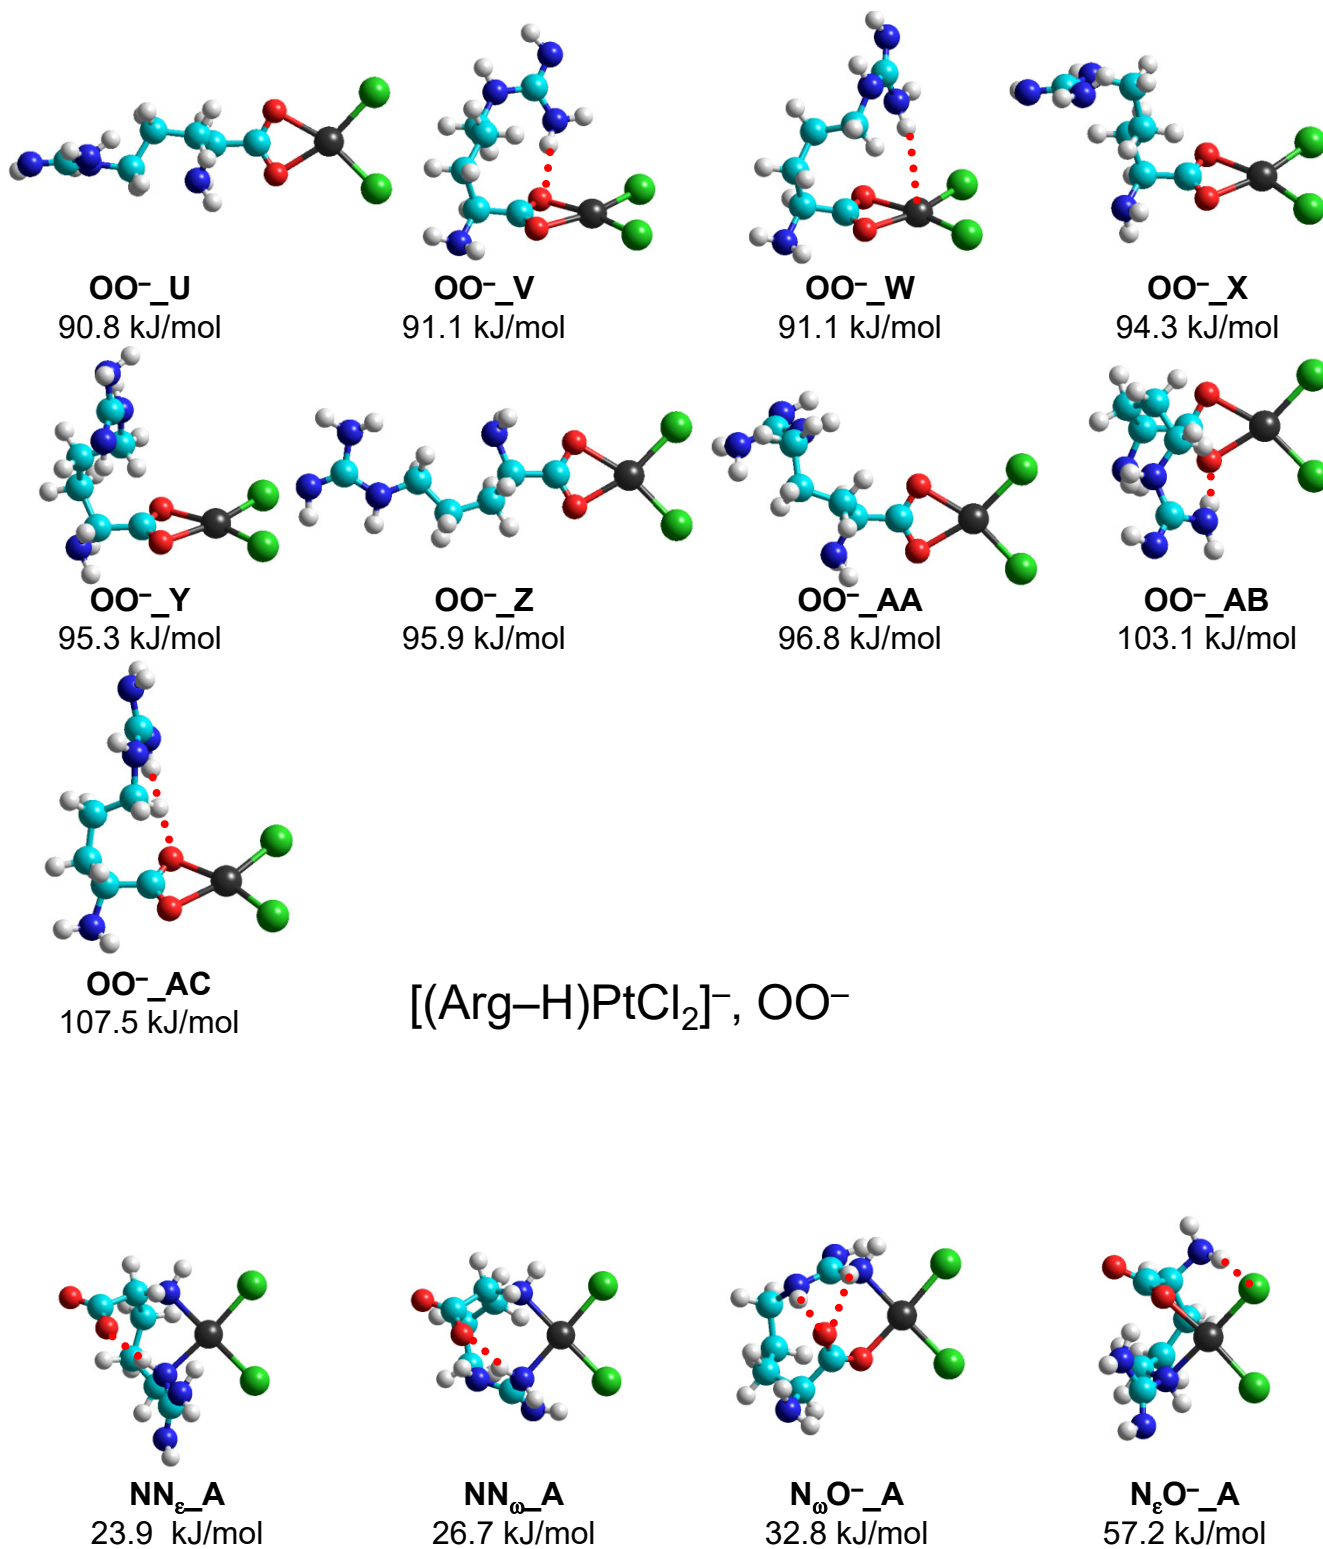

$[(\text{Arg-H})\text{PtCl}_2]^-$ , other side chain binding modes

Figure S5.

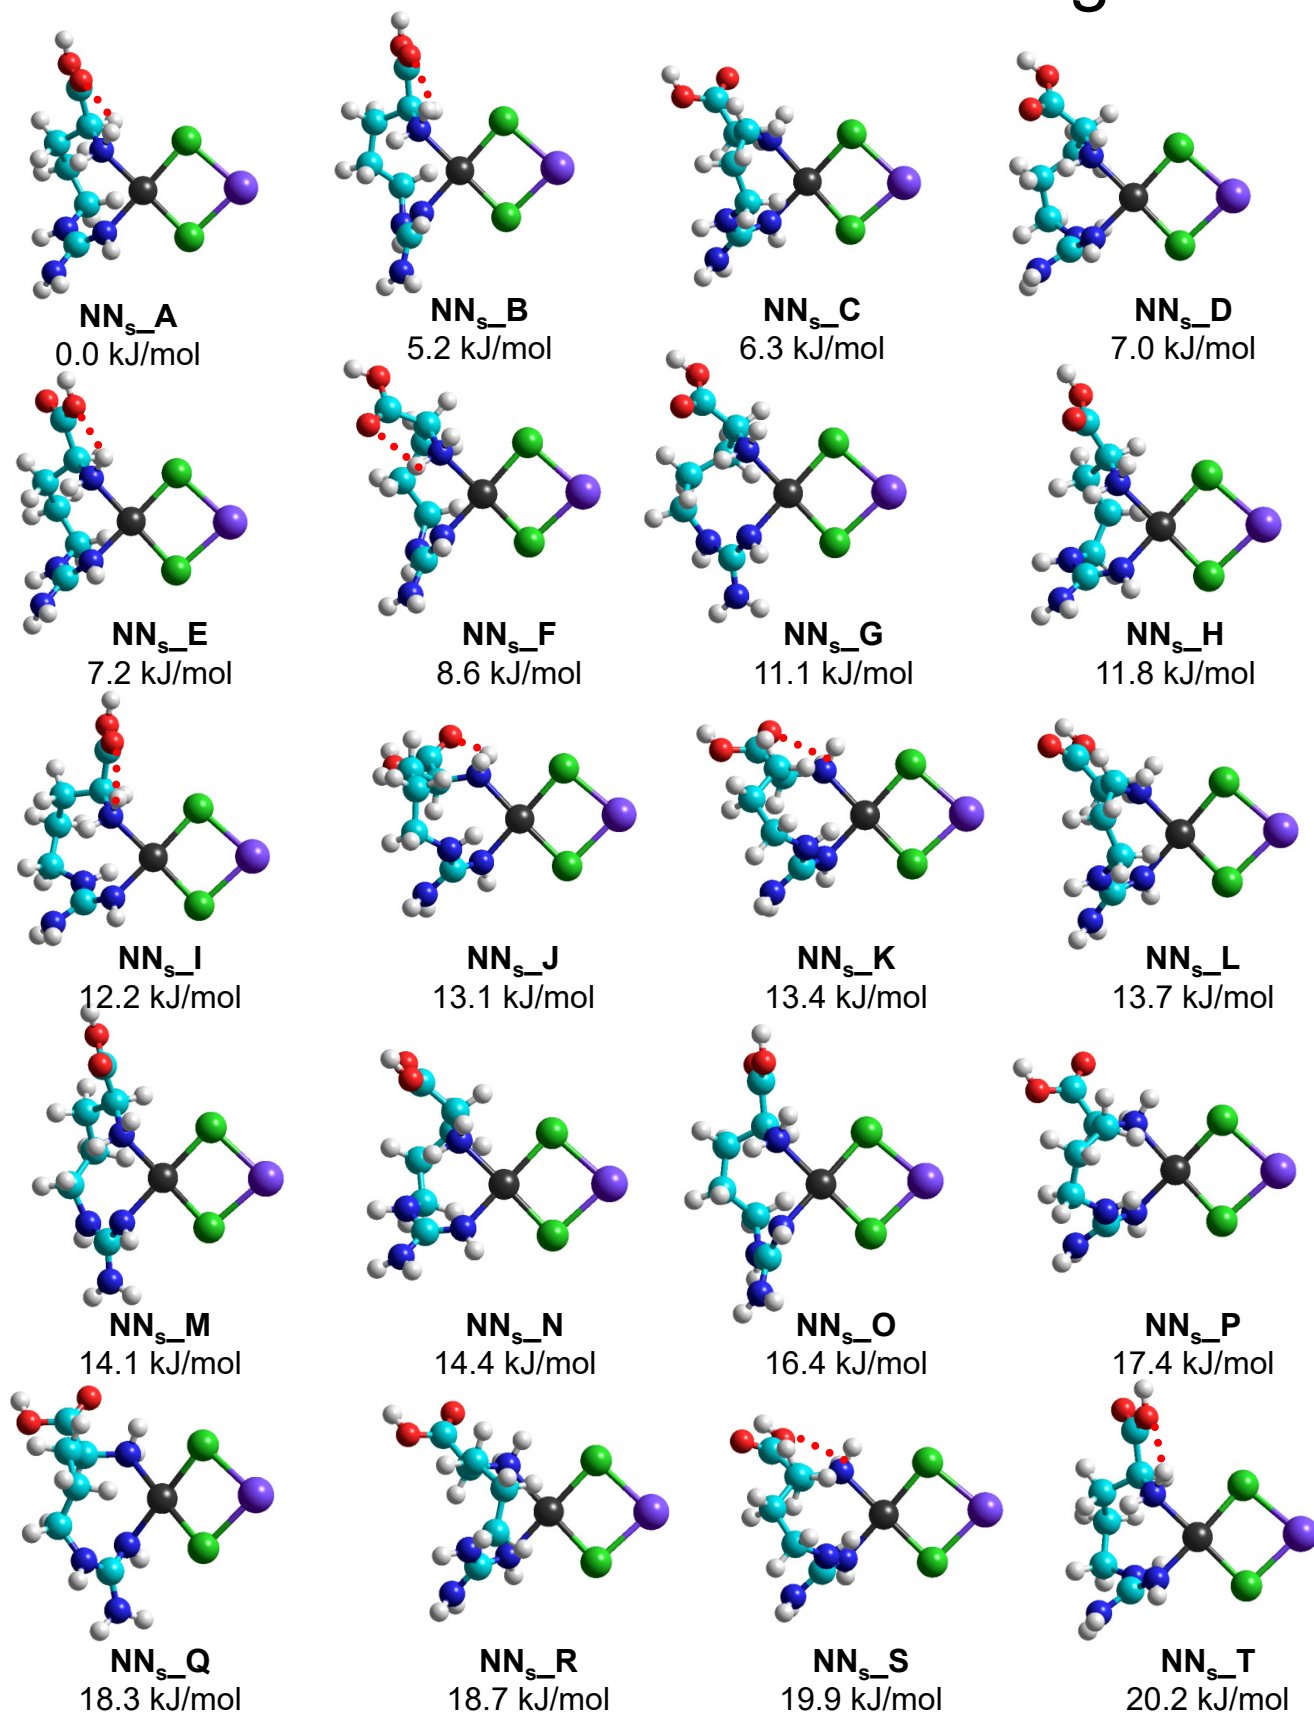

$[(\text{Arg})\text{PtCl}_2+\text{Na}]^+$ , NN<sub>s</sub>

## Figure S5.

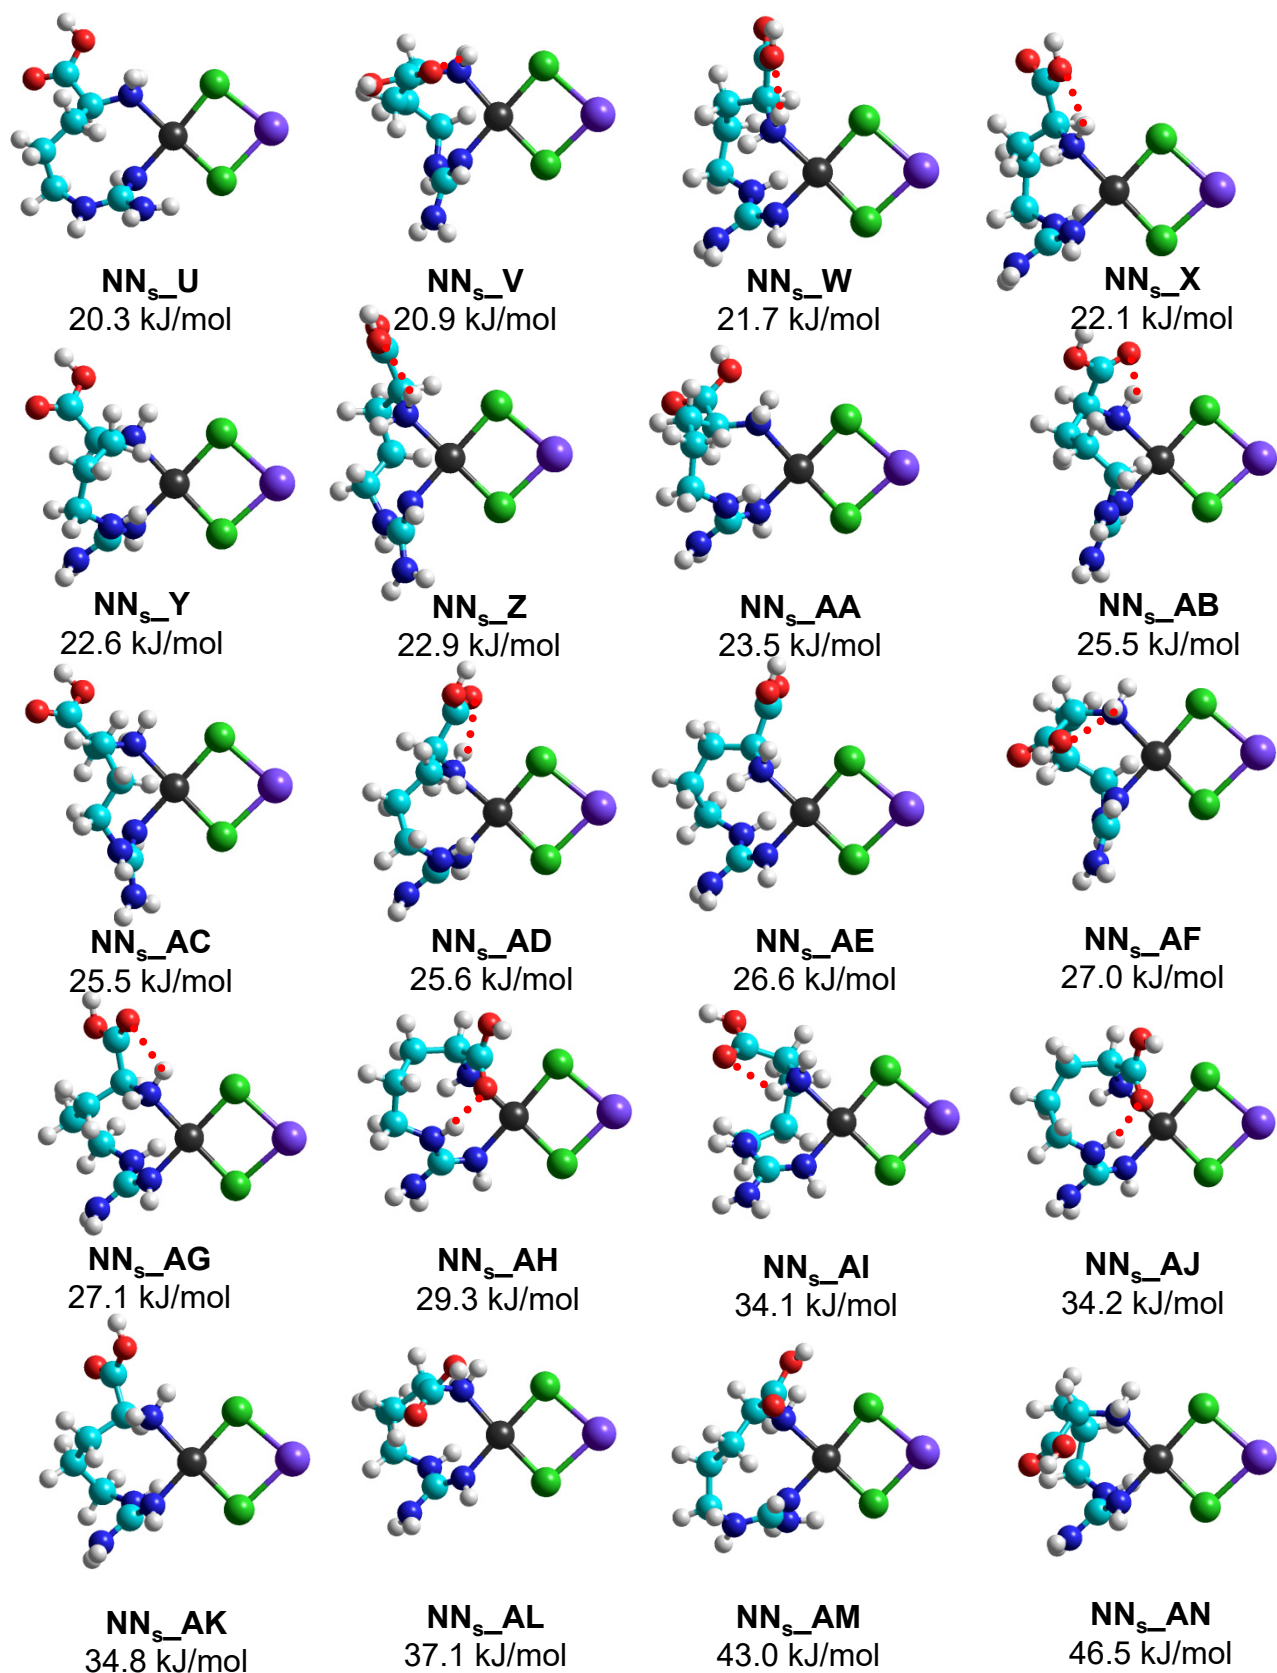

$[(\text{Arg})\text{PtCl}_2+\text{Na}]^+$ , NN<sub>s</sub>



Figure S5.

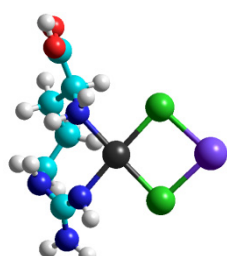

**NN<sub>s</sub>\_AO**  
50.1 kJ/mol

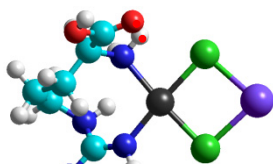

**NN<sub>s</sub>\_AP**  
53.7 kJ/mol

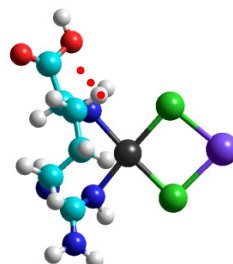

**NN<sub>s</sub>\_AQ**  
58.2 kJ/mol

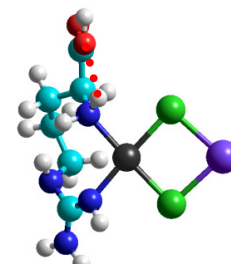

**NN<sub>s</sub>\_AR**  
67.9 kJ/mol

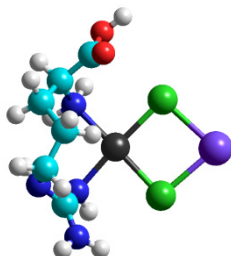

**NN<sub>s</sub>\_AS**  
71.9 kJ/mol

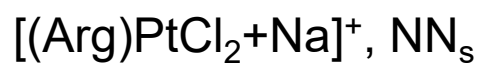

## Figure S5.

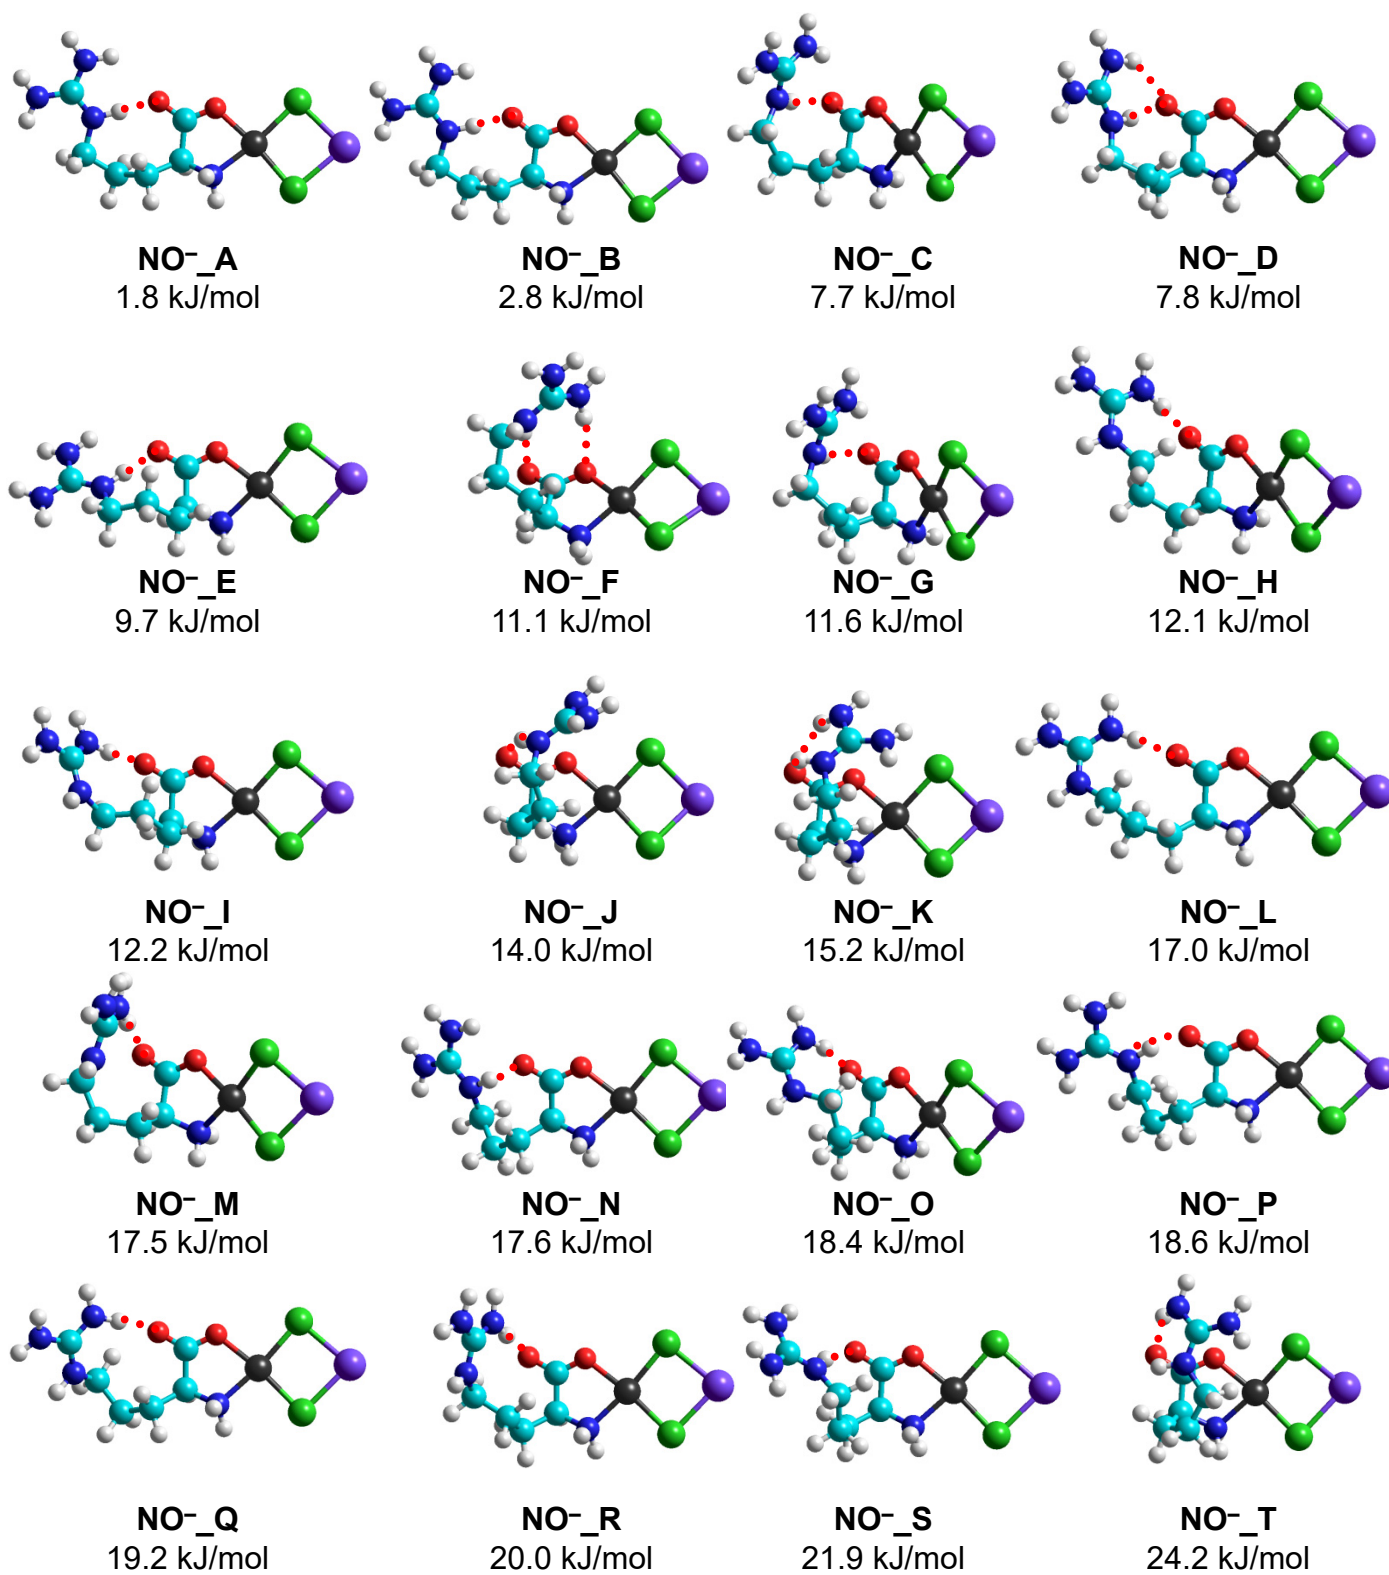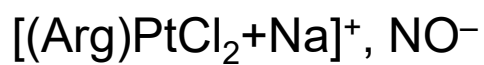

## Figure S5.

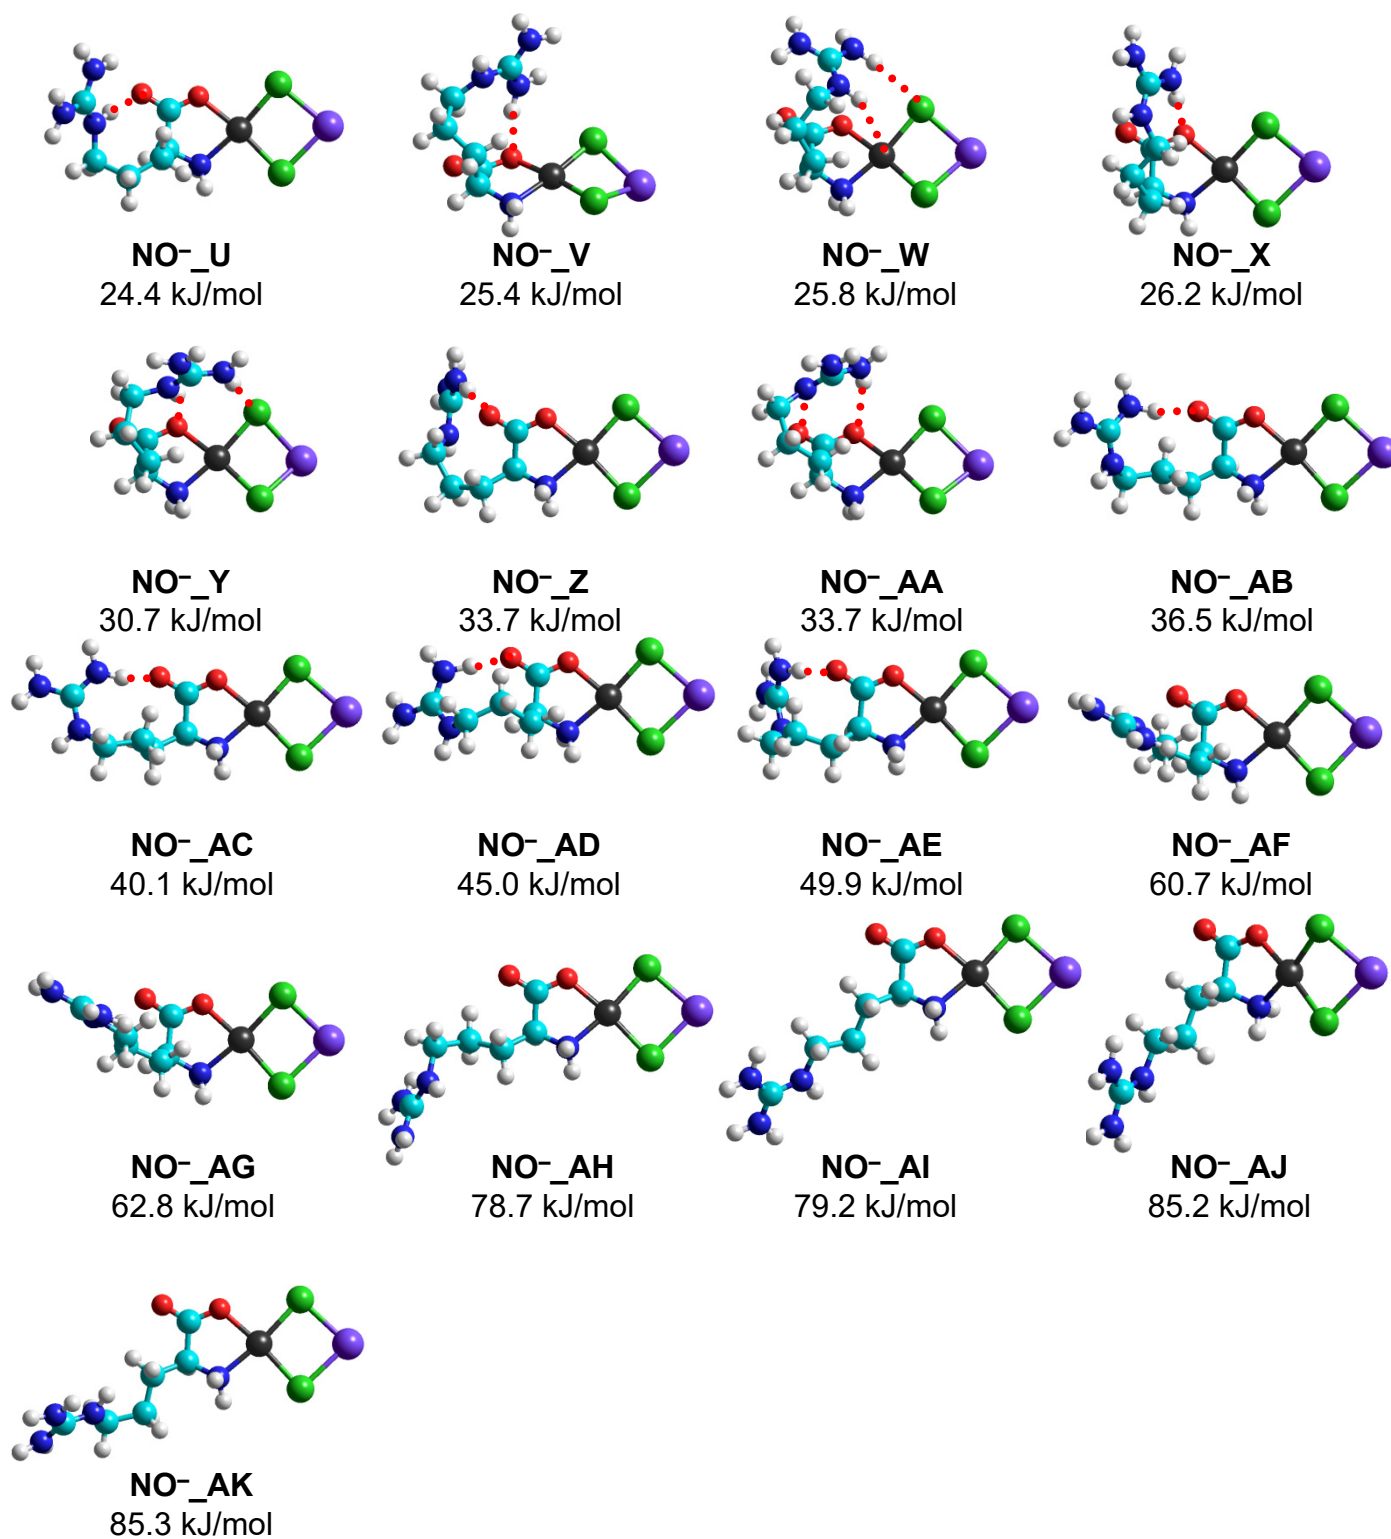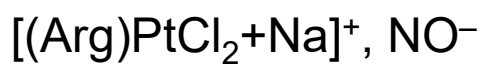

## Figure S5.

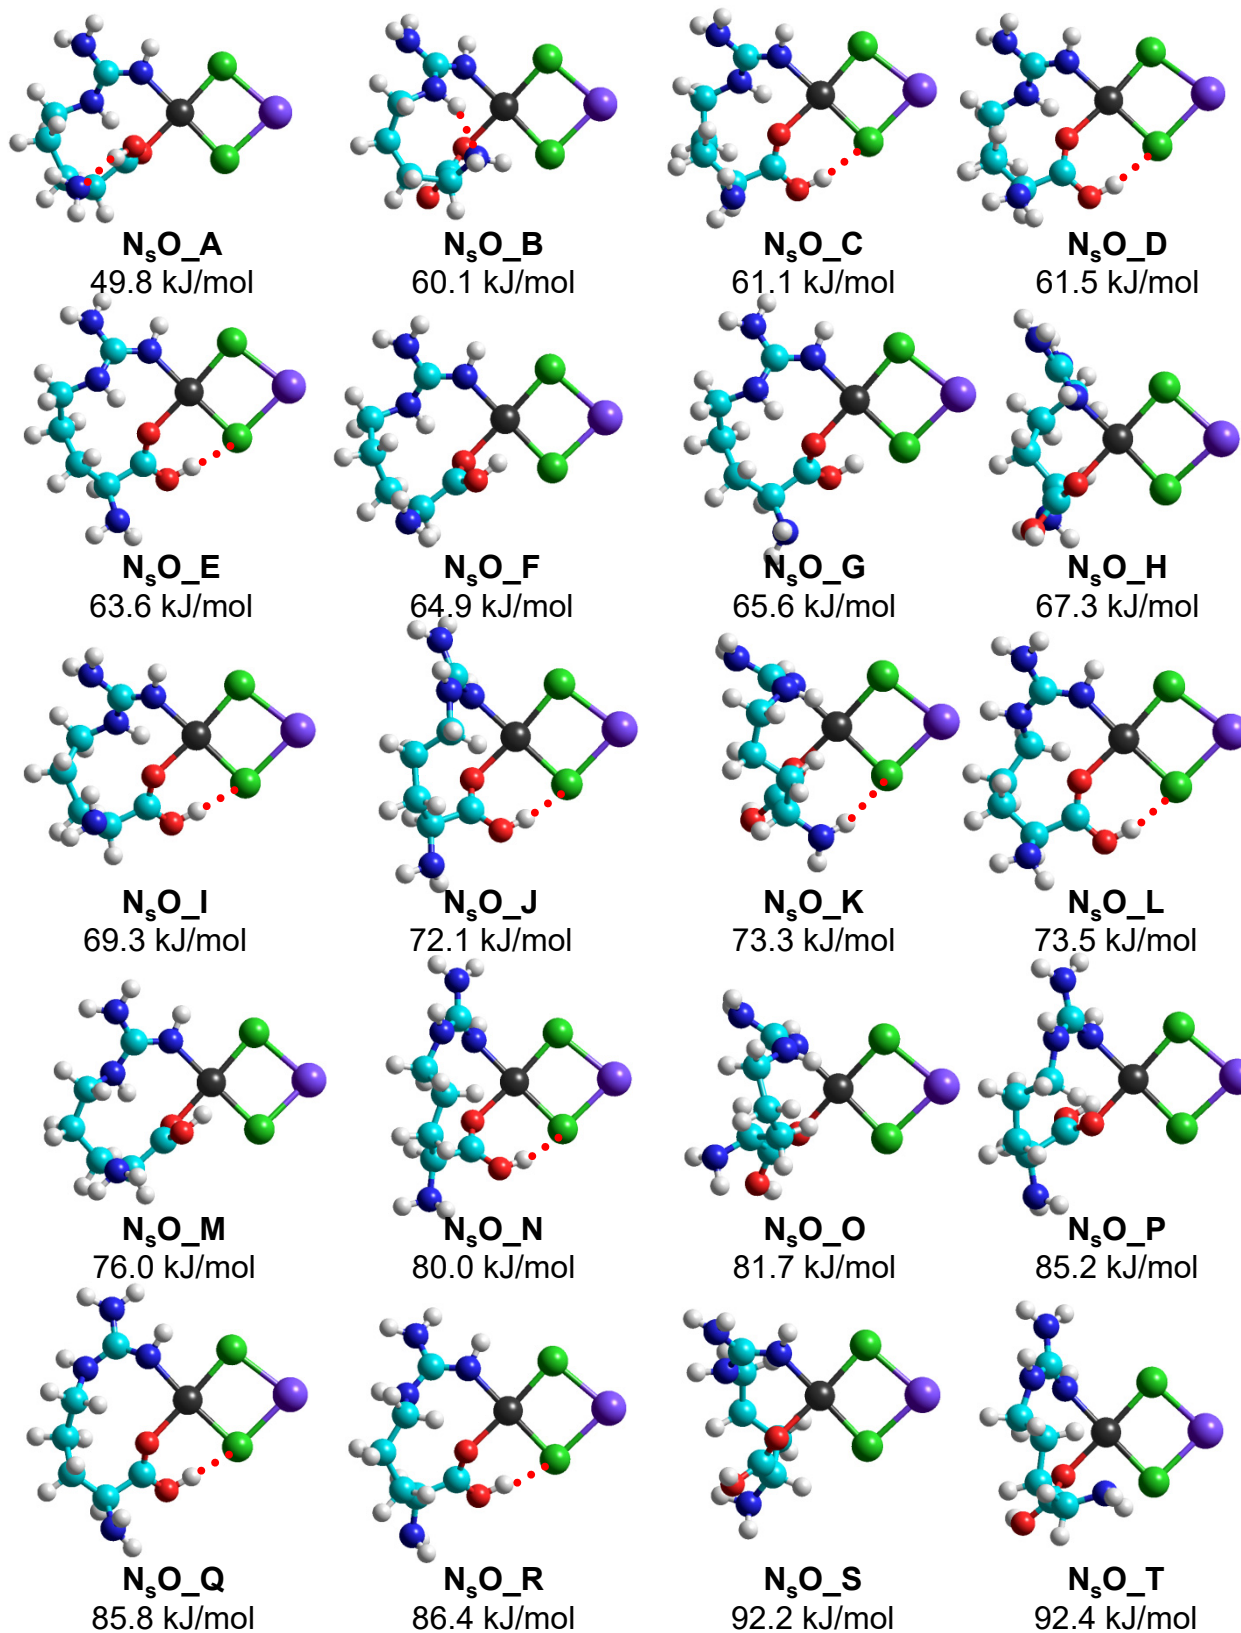

$[(\text{Arg})\text{PtCl}_2+\text{Na}]^+, \text{N}_s\text{O}$

## Figure S5.

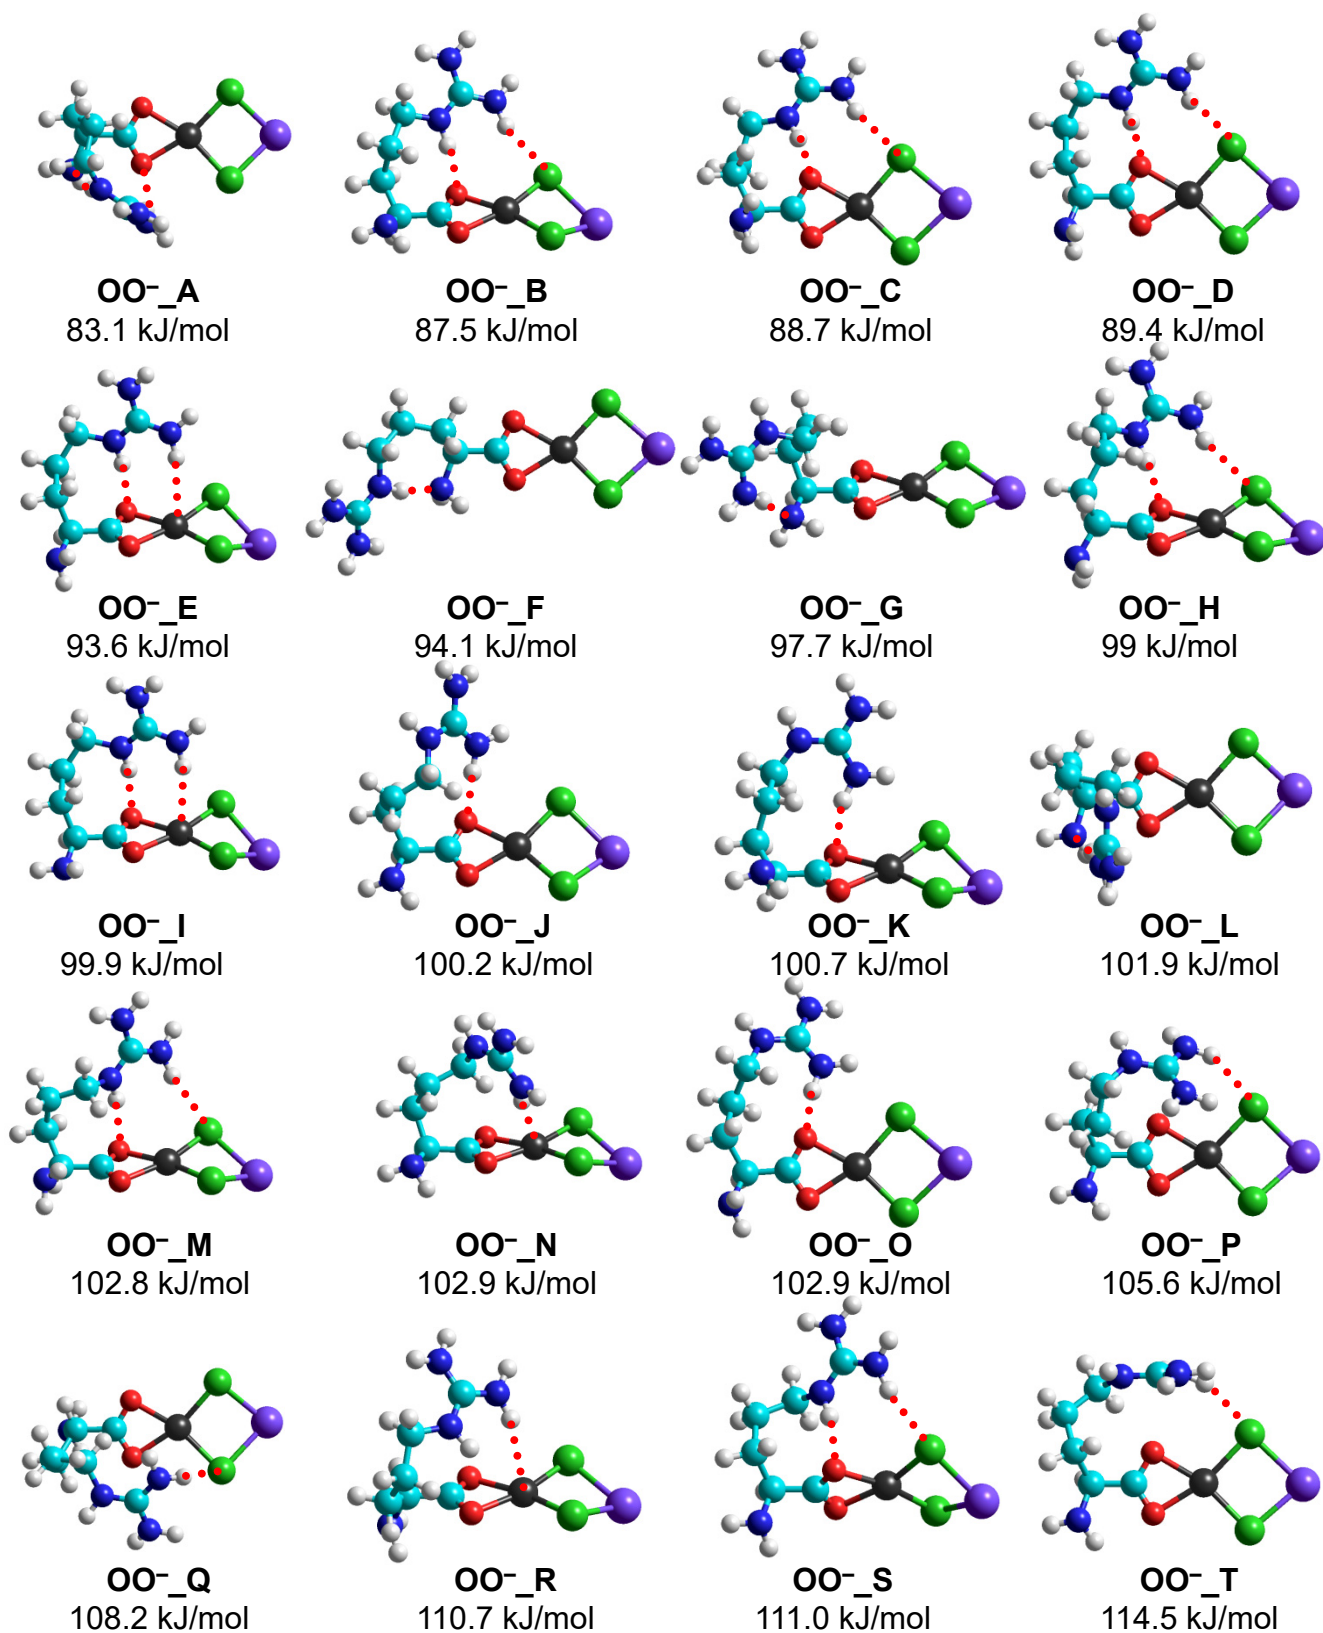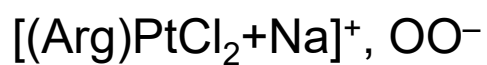

## Figure S5.

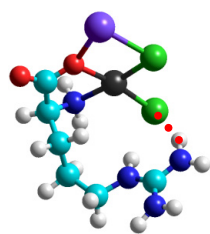

**NO<sup>-</sup>\_OCl<sub>b</sub>\_A**  
21.4 kJ/mol

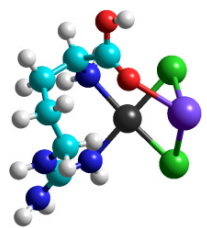

**NN<sub>s</sub>\_OCl<sub>b</sub>Cl<sub>s</sub>\_A**  
36.7 kJ/mol

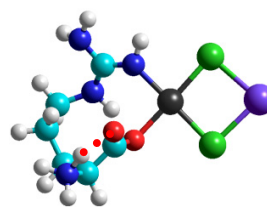

**N<sub>s</sub>O<sup>-</sup>\_A**  
65.8 kJ/mol

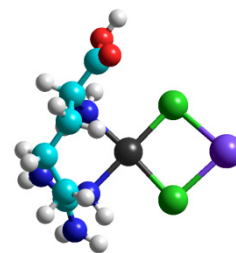

**NN<sub>ε</sub>\_A**  
67.7 kJ/mol

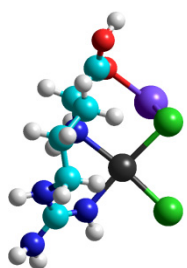

**NN<sub>s</sub>\_OCl<sub>s</sub>\_A**  
69.2 kJ/mol

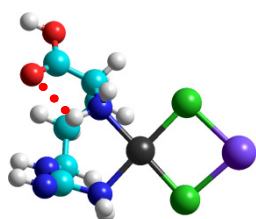

**NN<sub>ω</sub>\_A**  
80.1 kJ/mol

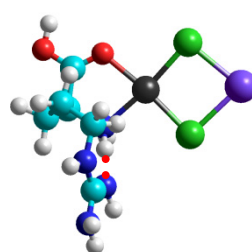

**NO\_A**  
84.1 kJ/mol

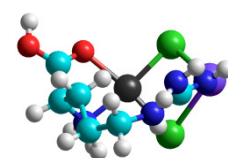

**NO\_N<sub>s</sub>Cl<sub>b</sub>Cl<sub>o</sub>\_A**  
86.5 kJ/mol

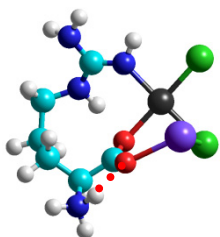

**N<sub>s</sub>O<sup>-</sup>\_OCl<sub>s</sub>\_A**  
97.7 kJ/mol

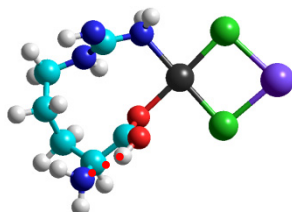

**N<sub>ω</sub>O\_A**  
121.2 kJ/mol

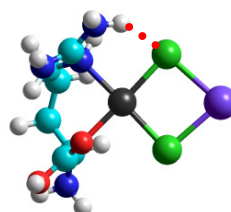

**N<sub>ε</sub>O\_A**  
145.9 kJ/mol

[(Arg)PtCl<sub>2</sub>+Na]<sup>+</sup>, Other side chain binding modes

Figure S6.

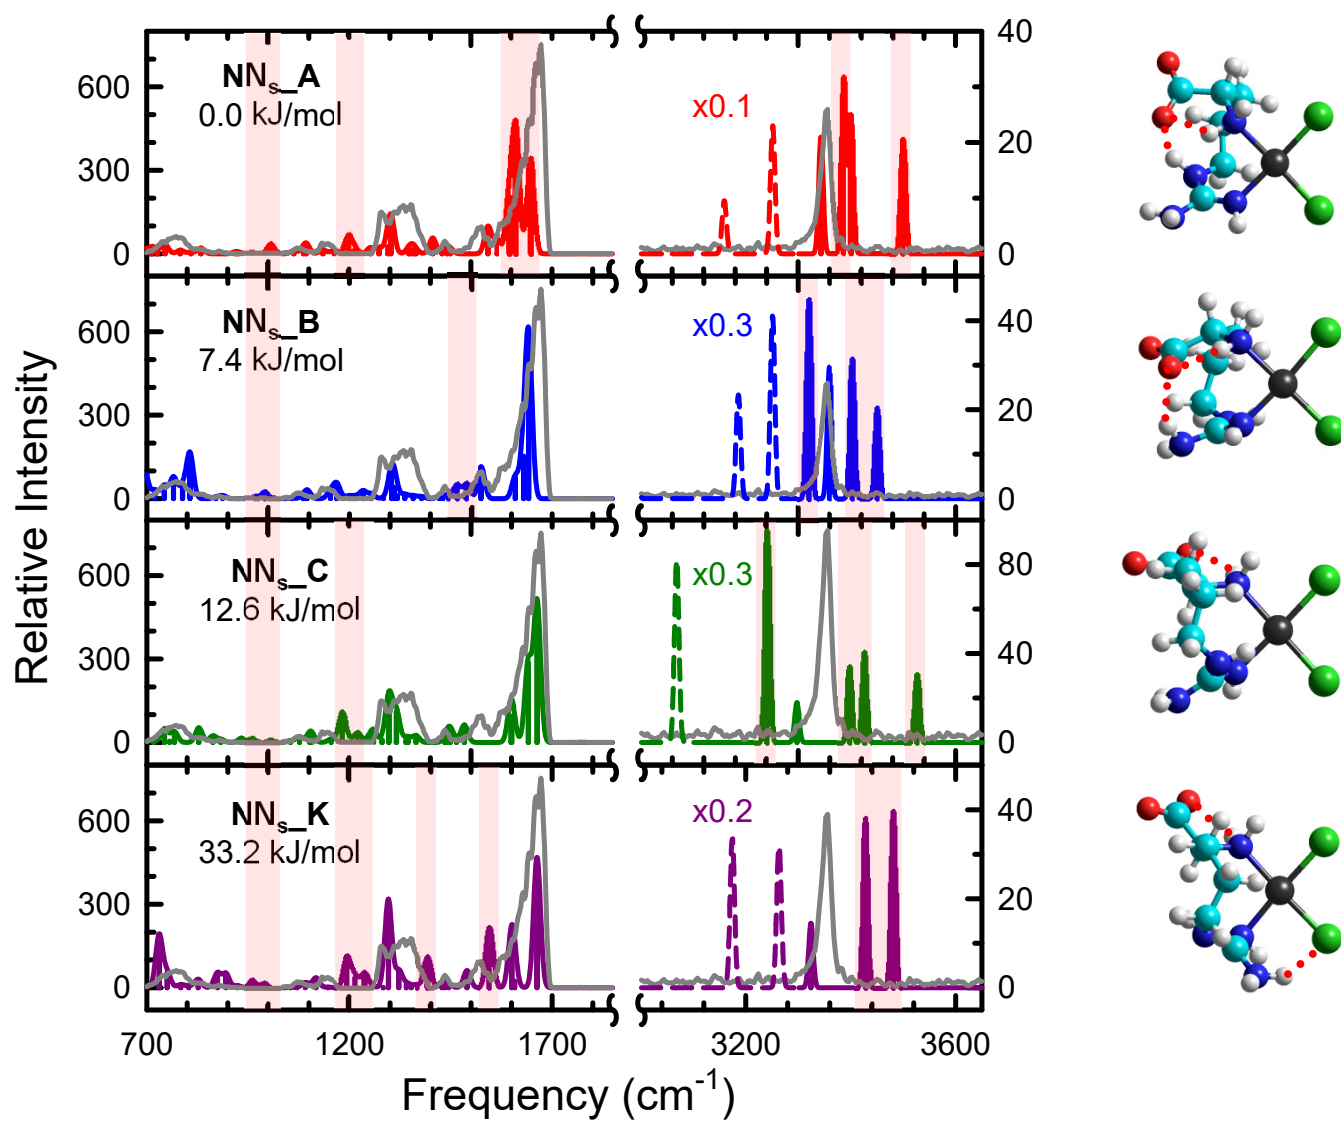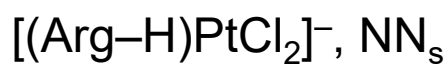

Figure S7.

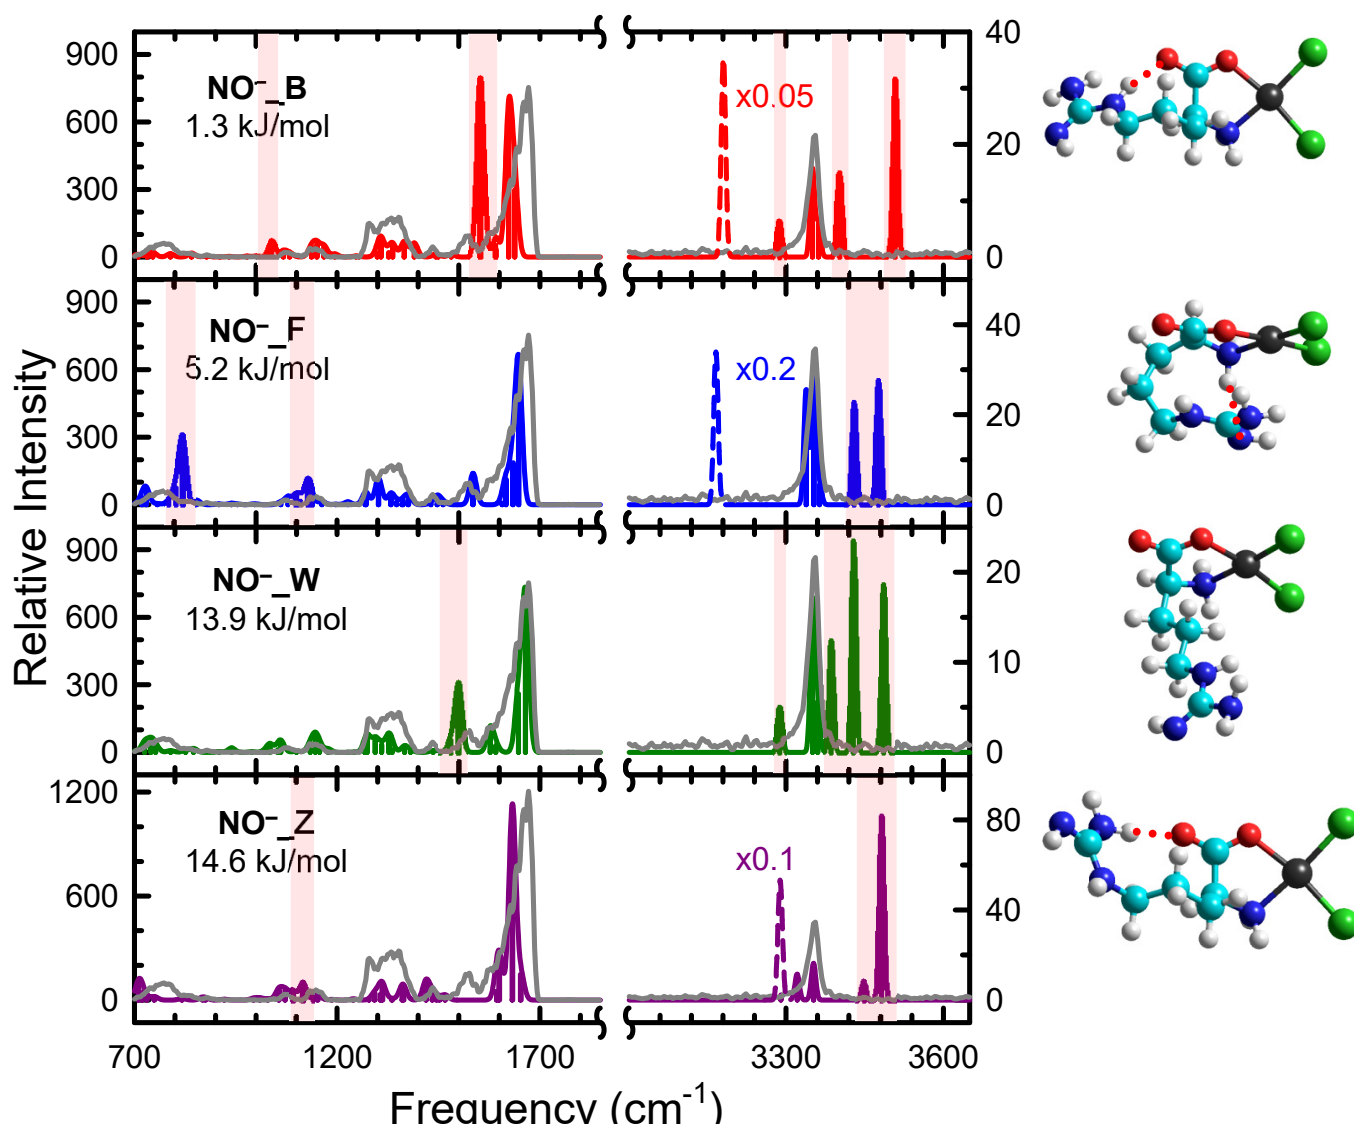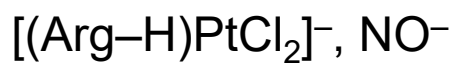



Figure S7.

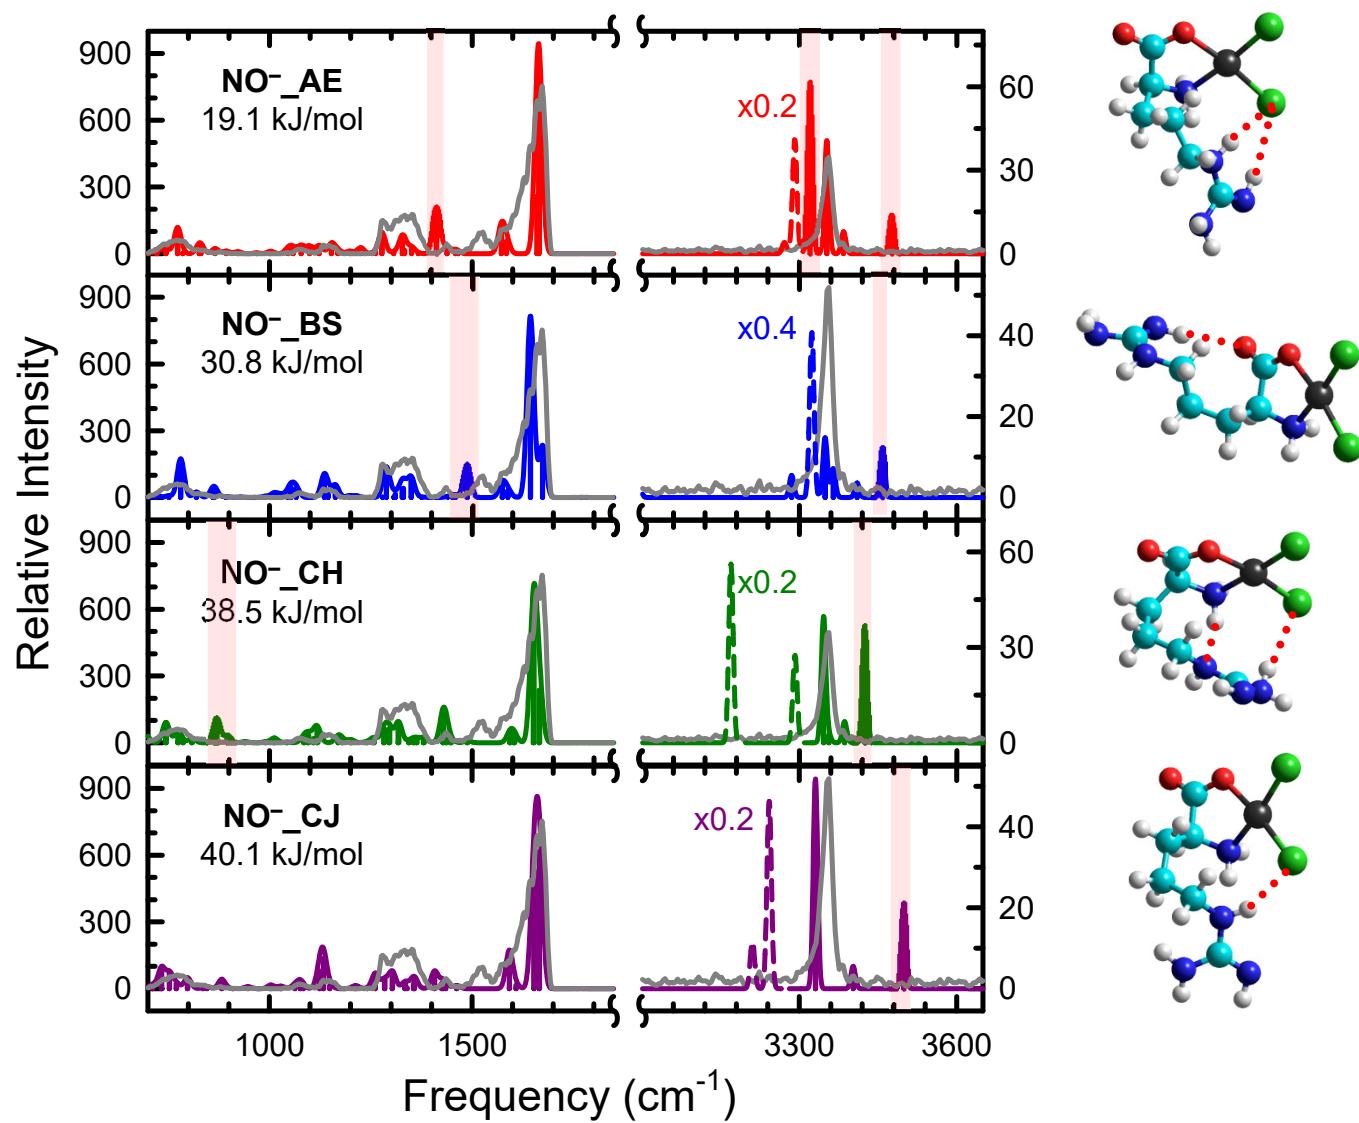

Figure S8.

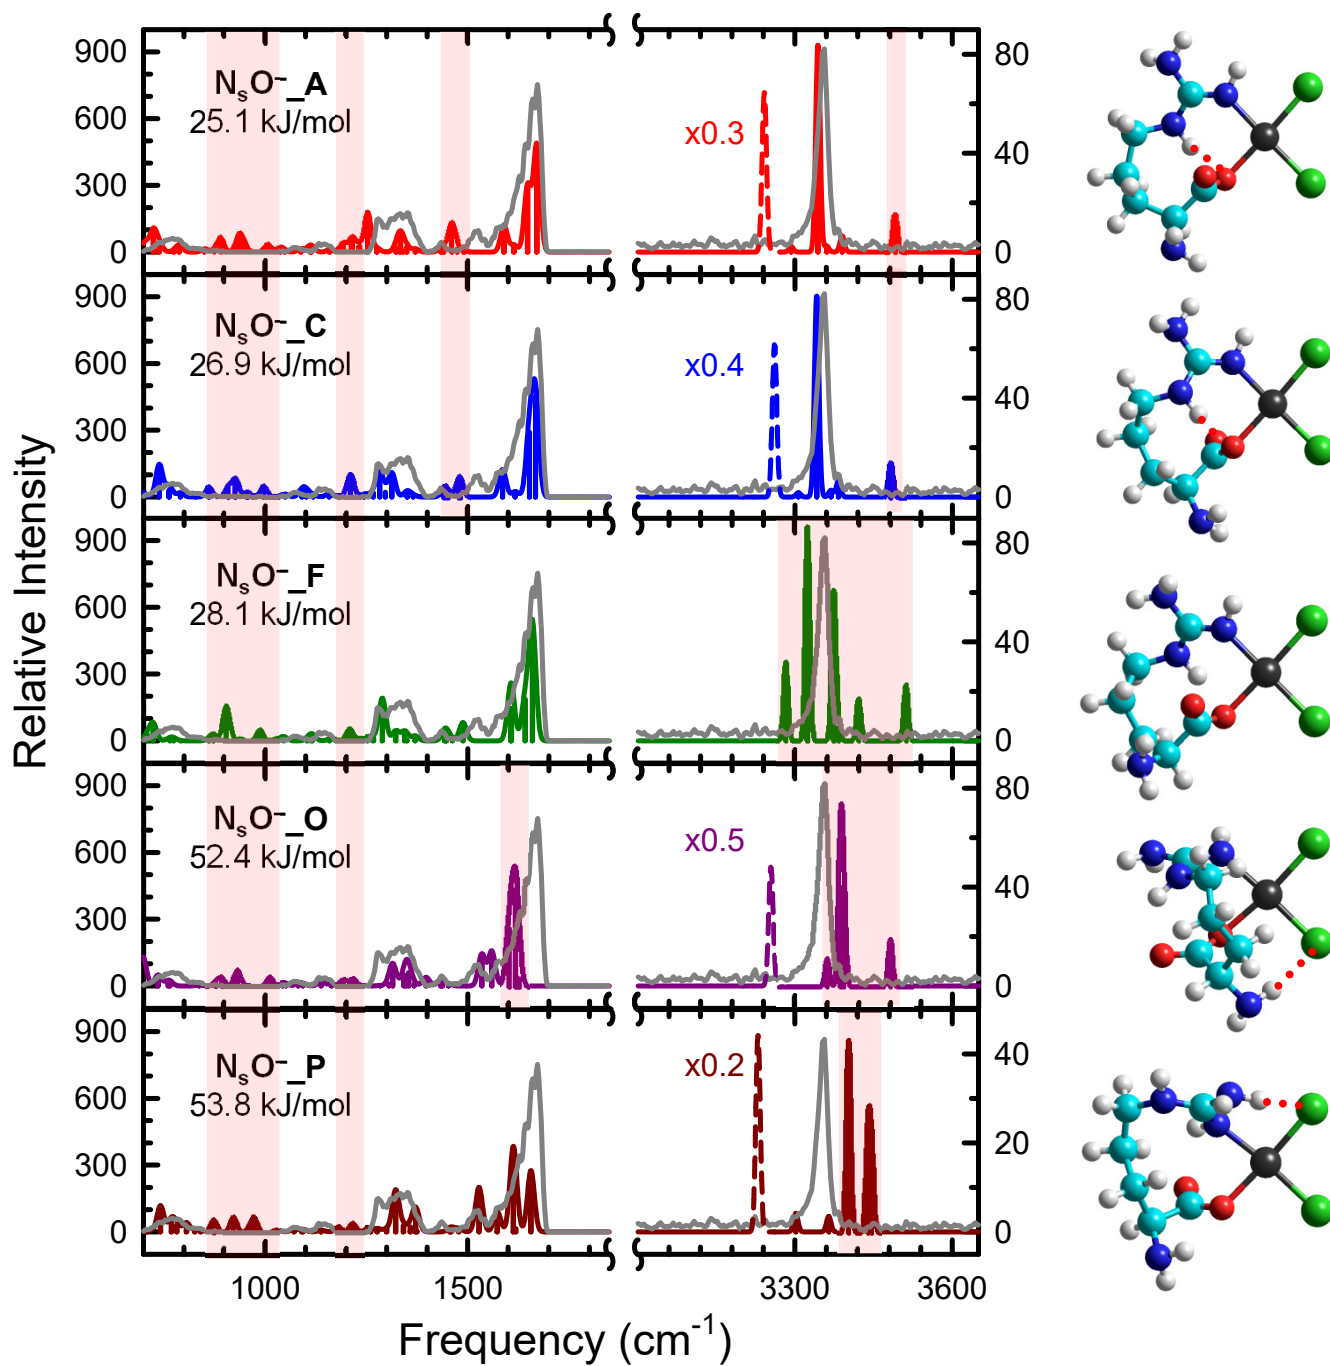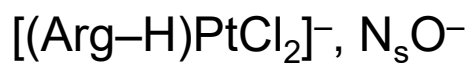

Figure S9.

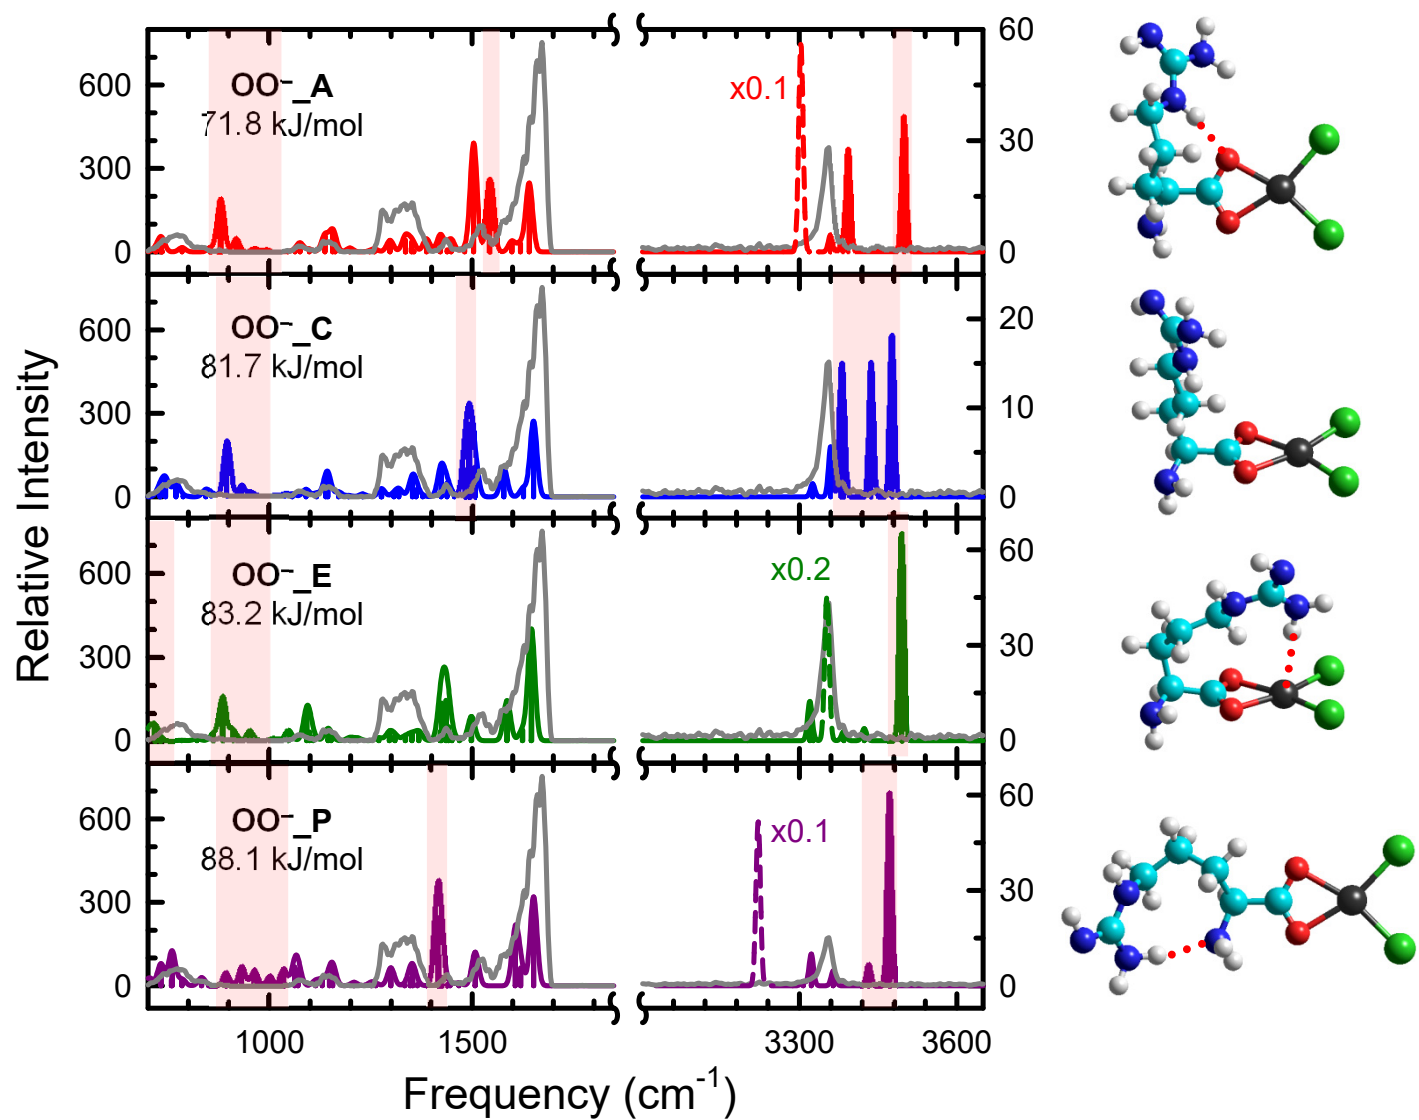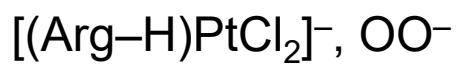

## Figure S10.

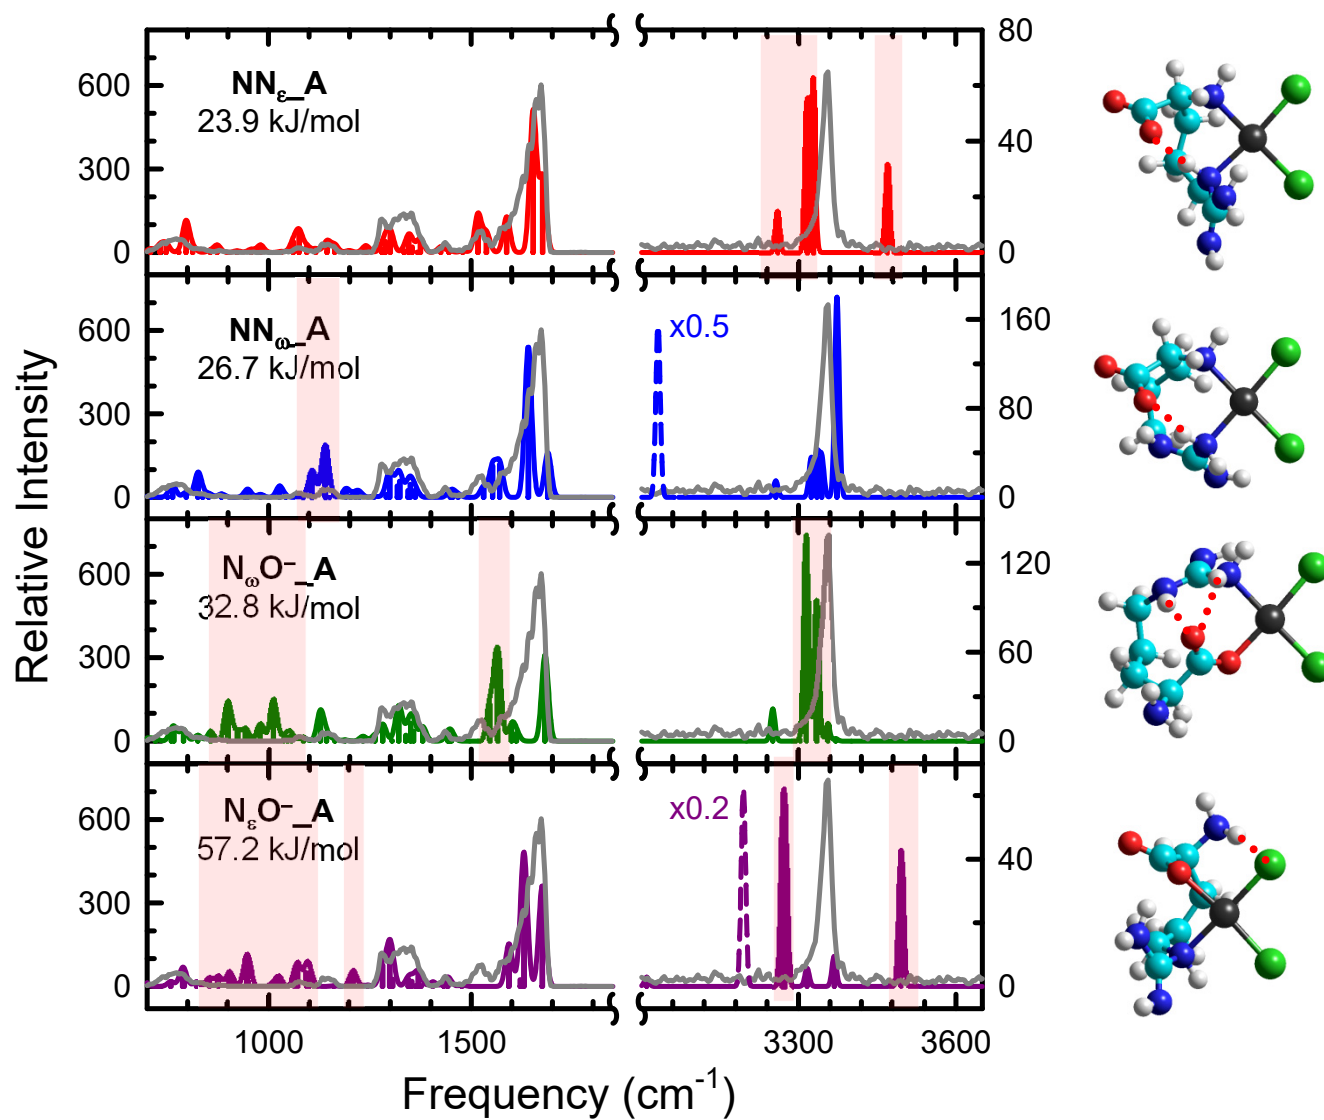

$[(\text{Arg-H})\text{PtCl}_2]^-$ , Other side chain binding modes

Figure S11.

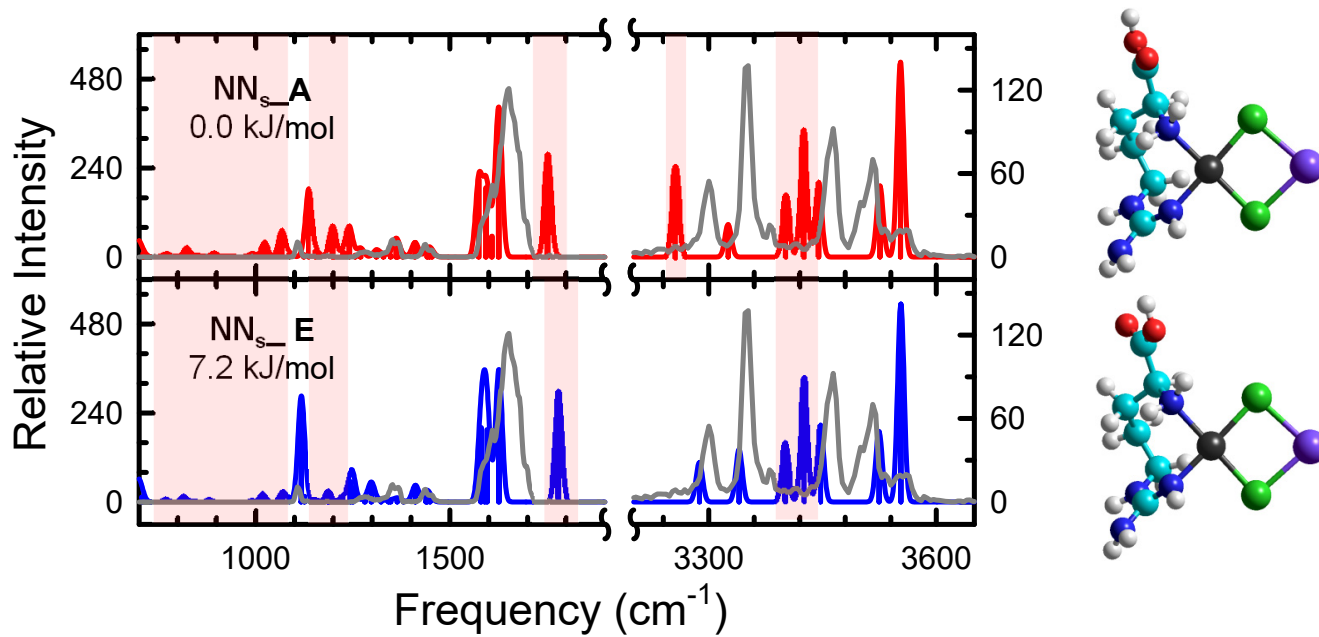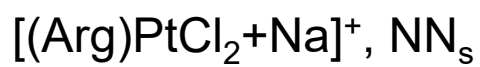

Figure S12.

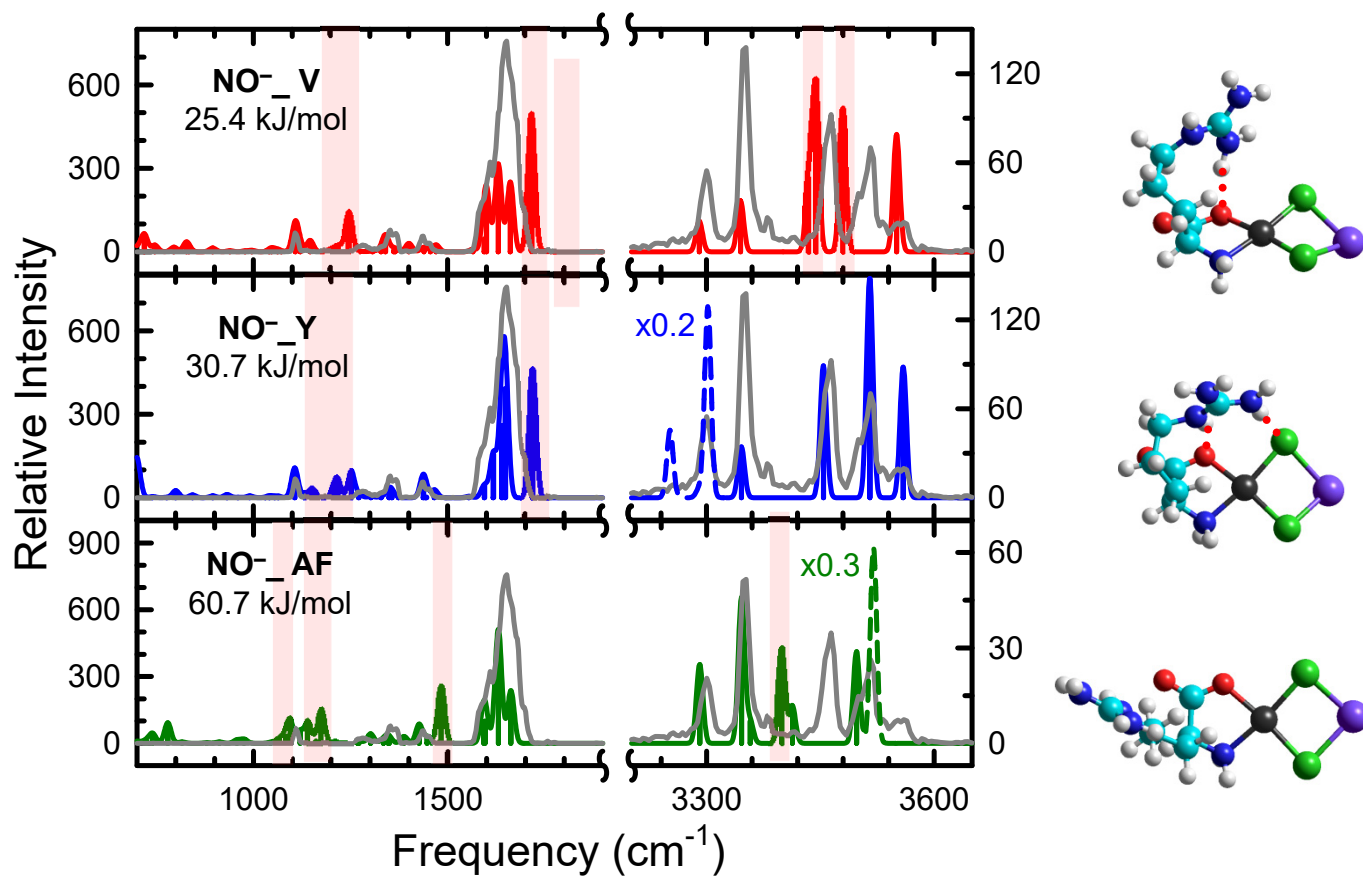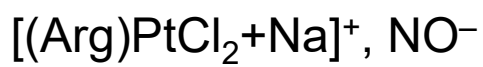

Figure S13.

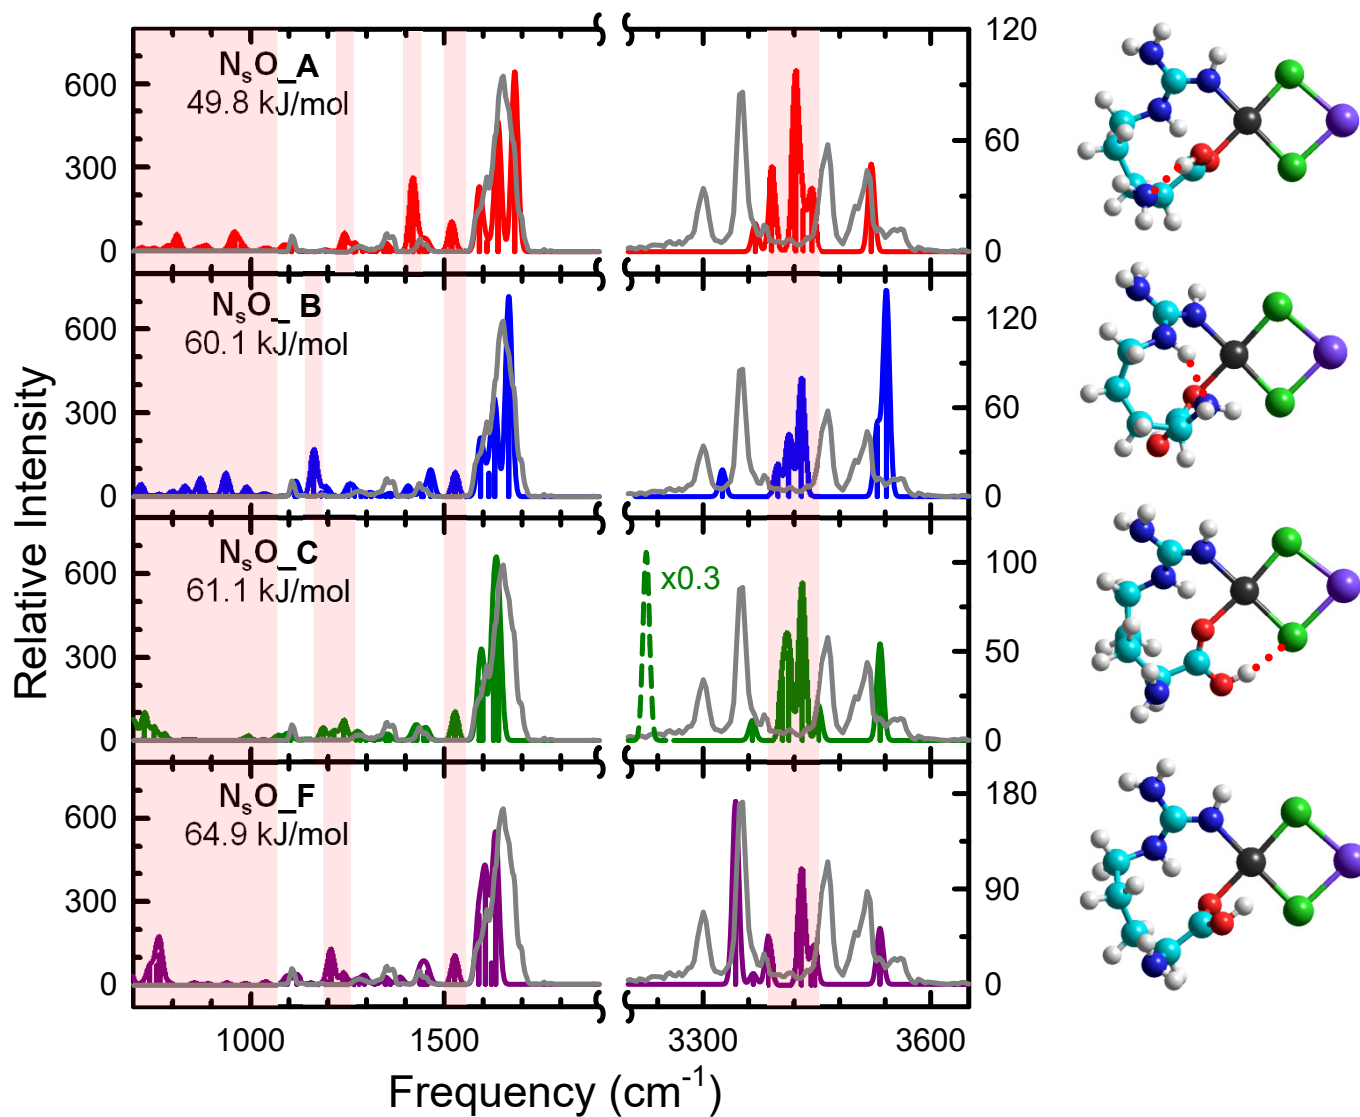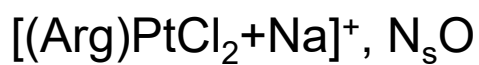

Figure S14.

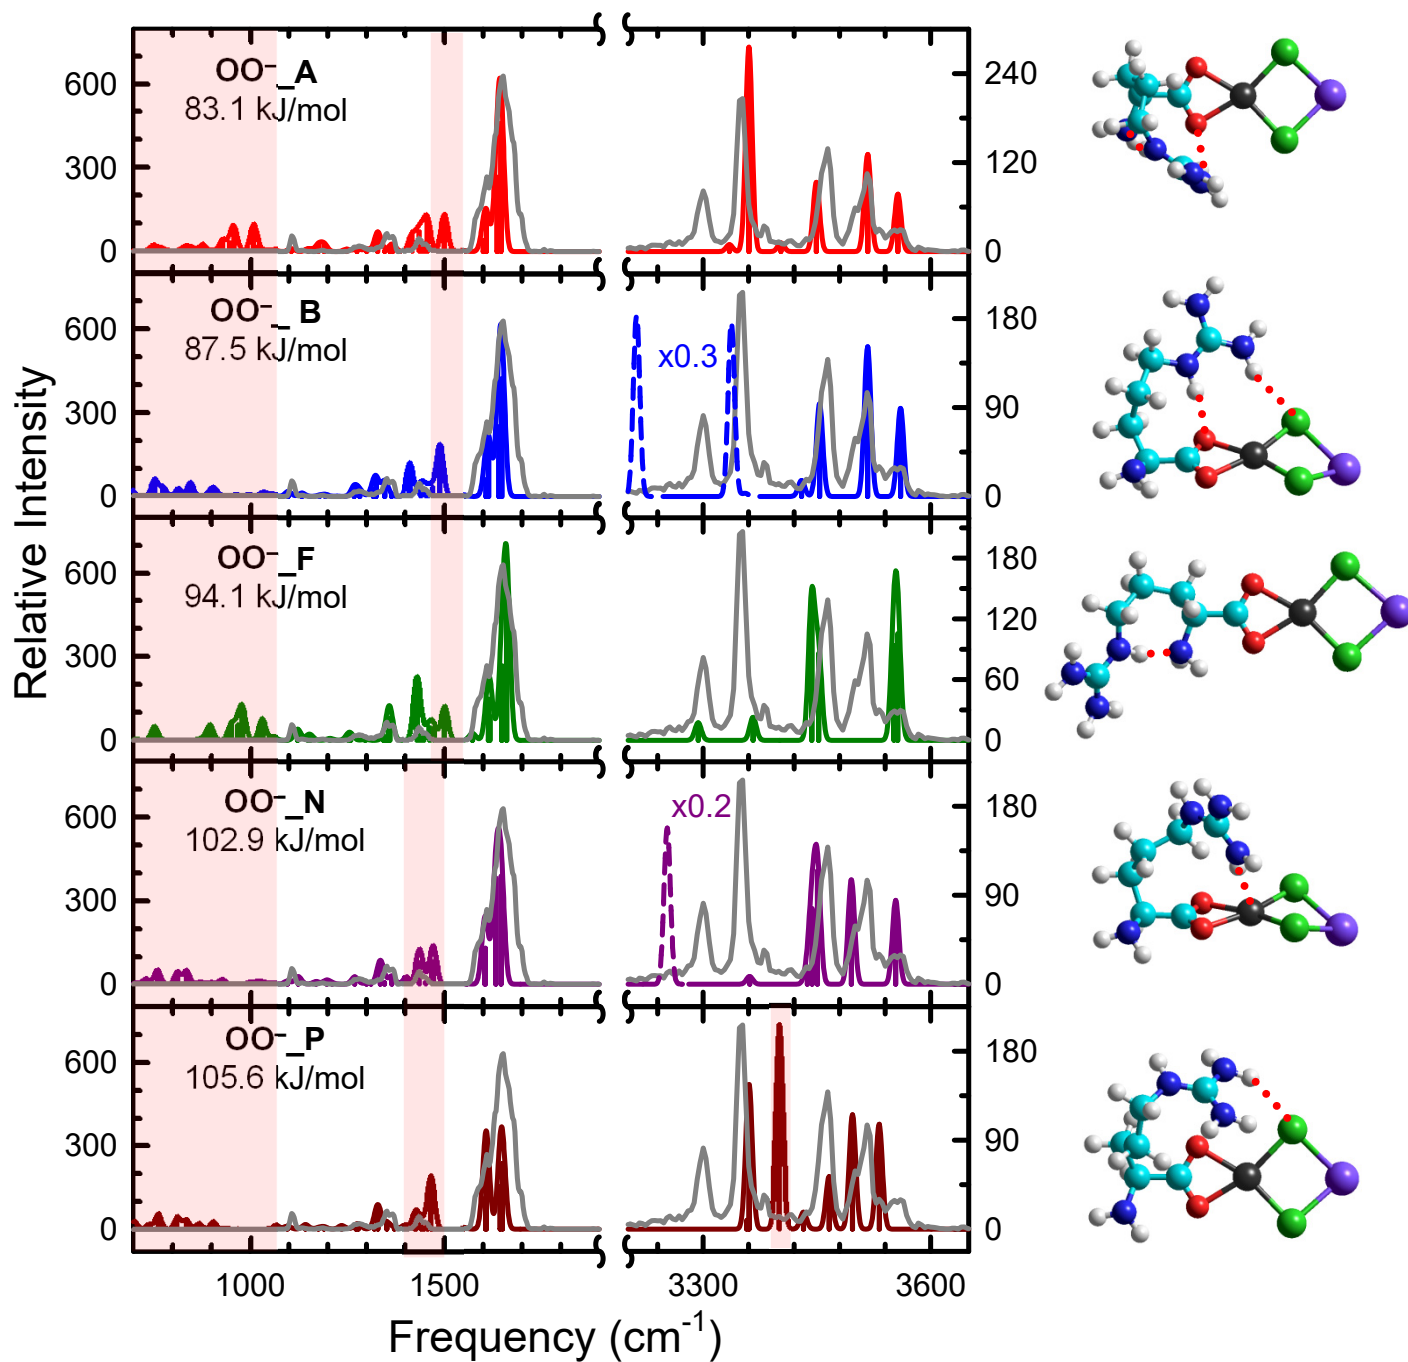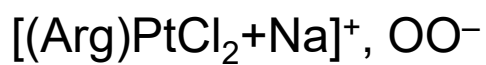



Figure S15.

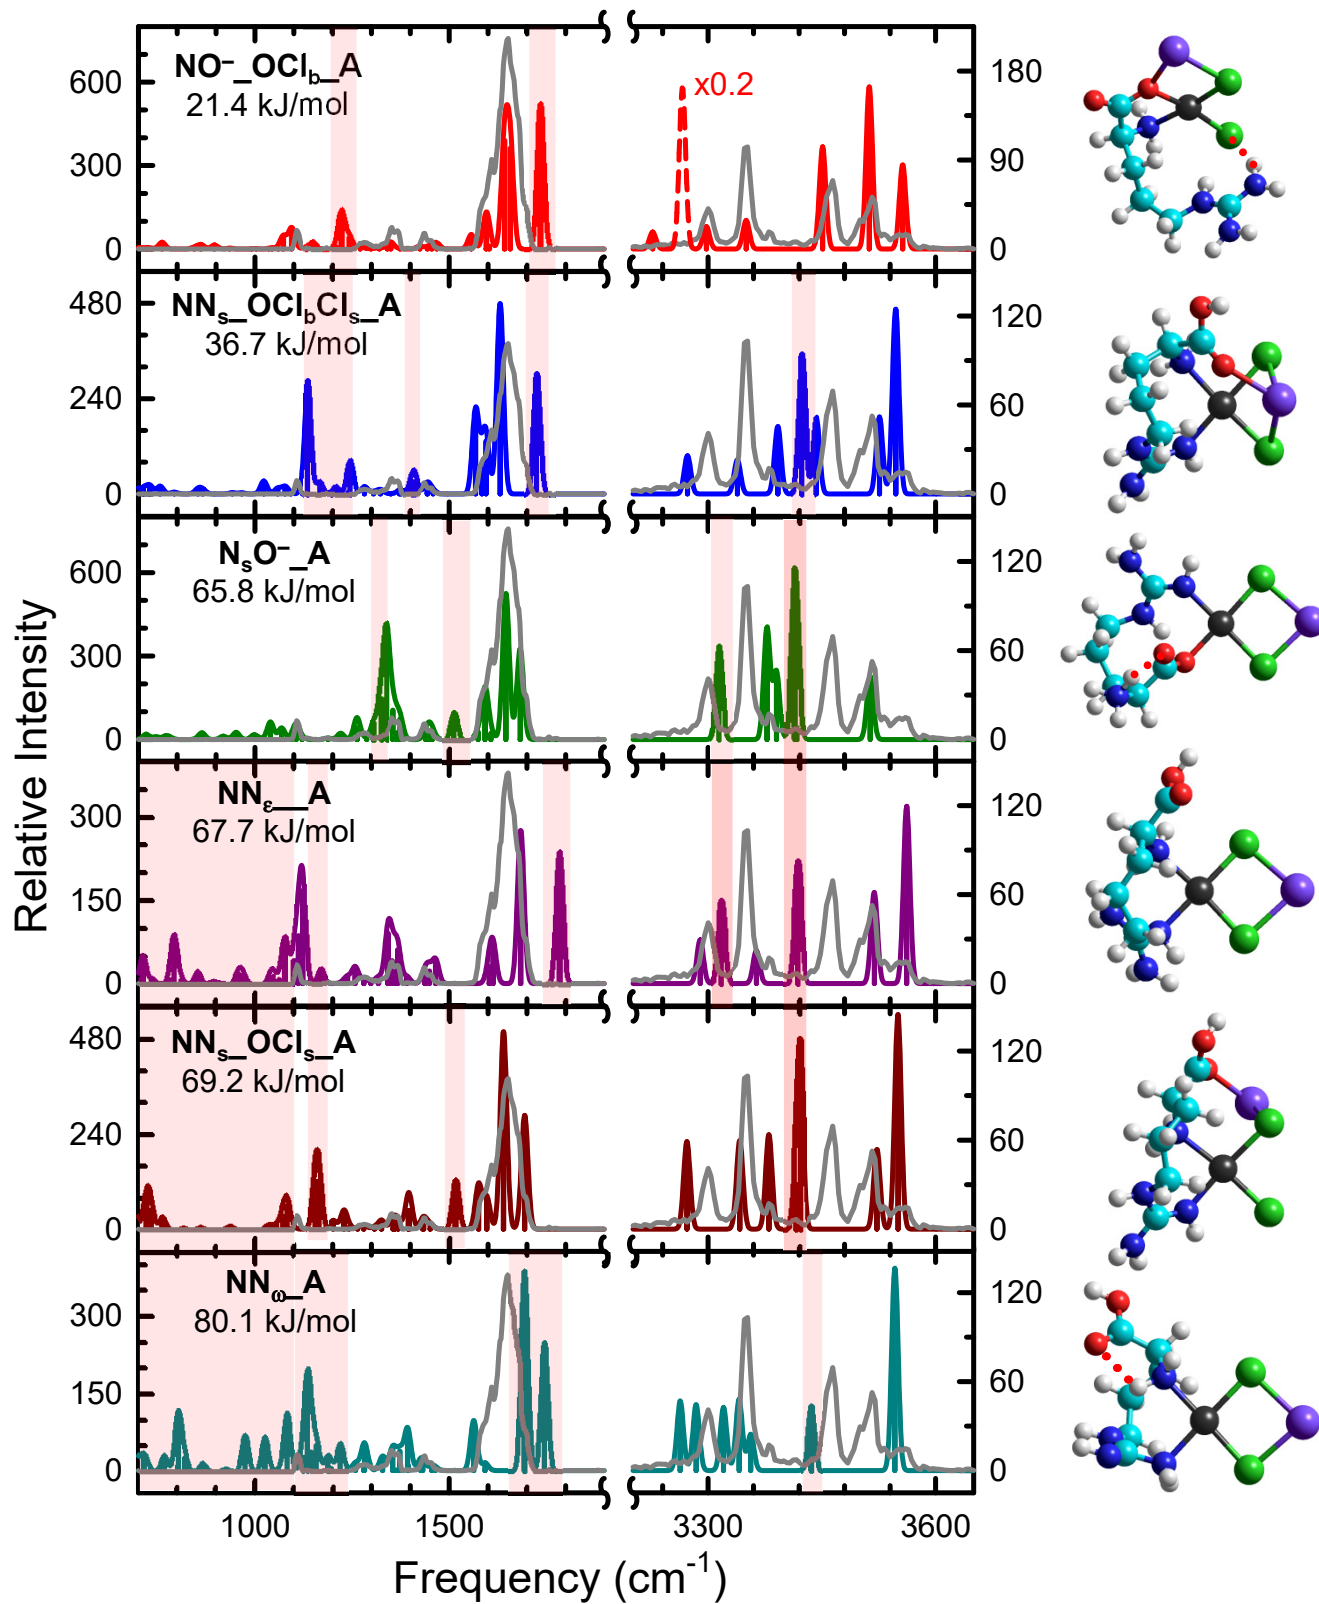

$[(\text{Arg})\text{PtCl}_2+\text{Na}]^+$ , Other side chain binding modes

## Figure S15.

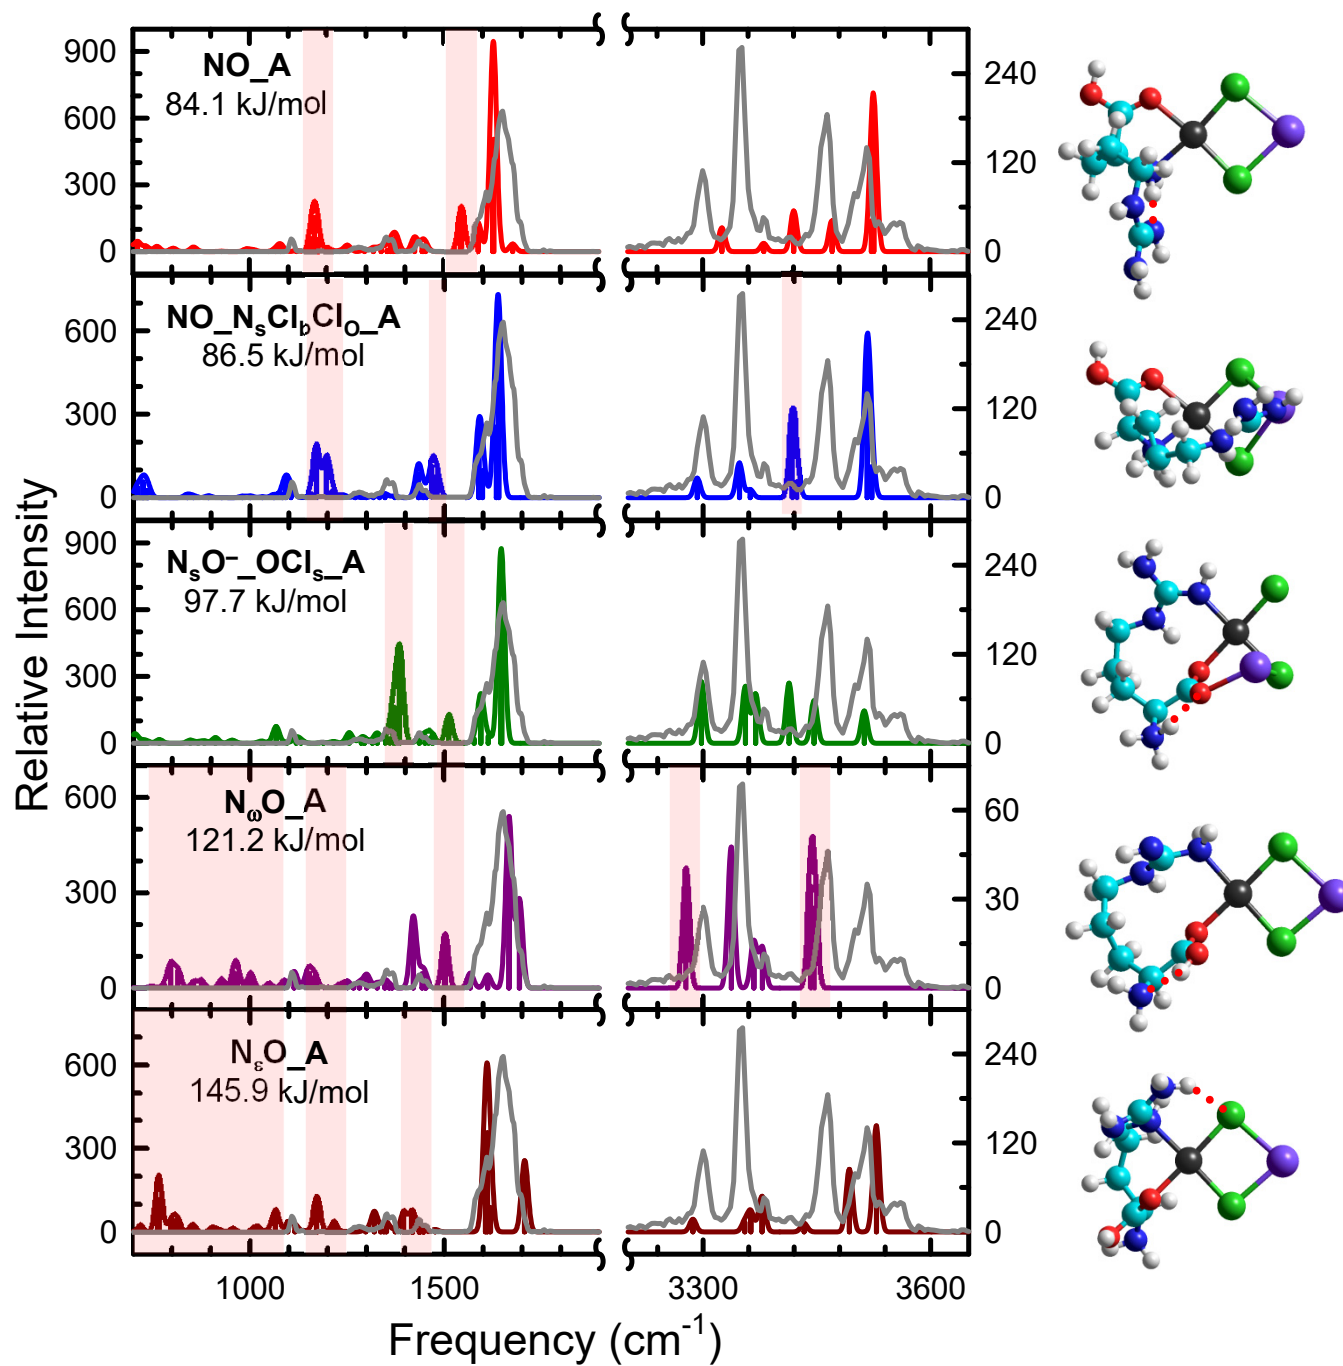

$[(\text{Arg})\text{PtCl}_2+\text{Na}]^+$ , Other side chain binding modes
